## Distinct Hierarchical Alterations of Intrinsic Neural Timescales Account for Different Manifestations of Psychosis

Kenneth Wengler, PhD<sup>a,b\*</sup>, Andrew T. Goldberg<sup>b</sup>, George Chahine, MD<sup>c</sup>, and Guillermo Horga, MD, PhD<sup>a,b\*</sup>

- a. Department of Psychiatry, Columbia University, New York, NY, USA
- b. New York State Psychiatric Institute, New York, NY, USA
- c. Department of Psychiatry, Yale University, New Haven, CT, USA
- d.

### Corresponding Authors

Kenneth Wengler, PhD

Postdoctoral Research Fellow, Columbia University

Division of Translational Imaging, New York State Psychiatric Institute

Kenneth.Wengler@nyspi.columbia.edu

646-774-5571

Guillermo Horga, MD, PhD

Florence Irving Associate Professor of Psychiatry, Columbia University

Division of Translational Imaging, New York State Psychiatric Institute

Guillermo.Horga@nyspi.columbia.edu

646-774-5810

### Keywords

Psychosis, Intrinsic Neural Timescale, Schizophrenia, Excitation-Inhibition Balance, Hierarchical Perceptual Inference

## 1 **Abstract**

2 Hierarchical perceptual-inference models of psychosis may provide a holistic framework for  
3 understanding psychosis in schizophrenia including heterogeneity in clinical presentations.  
4 Particularly, hypothesized alterations at distinct levels of the perceptual-inference hierarchy may  
5 explain why hallucinations and delusions tend to cluster together yet sometimes manifest in  
6 isolation. To test this, we used a recently developed resting-state fMRI measure of intrinsic neural  
7 timescale (INT), which reflects the time window of neural integration and captures hierarchical  
8 brain gradients. In analyses examining extended sensory hierarchies that we first validated, we  
9 found distinct hierarchical INT alterations for hallucinations versus delusions in the auditory and  
10 somatosensory systems, thus providing support for hierarchical perceptual-inference models of  
11 psychosis. Simulations using a large-scale biophysical model suggested local elevations of  
12 excitation-inhibition ratio at different hierarchical levels as a potential mechanism. More generally,  
13 our work highlights the robustness and utility of INT for studying hierarchical processes relevant  
14 to basic and clinical neuroscience.

15

16

## 17 **Introduction**

18 Hallucinations and delusions are burdensome symptoms that typically manifest together as the  
19 psychotic syndrome of schizophrenia. Perceptual-inference models of psychosis suggest that  
20 these symptoms result from alterations in the updating of internal models of the environment that  
21 are used to make inferences about external sensory events and their causes (Adams et al., 2013;  
22 Horga and Abi-Dargham, 2019; Sterzer et al., 2018). These models are receiving increasing  
23 empirical support (Adams et al., 2018; Baker et al., 2019; Cassidy et al., 2018; Davies et al.,  
24 2017; Powers et al., 2017; Teufel et al., 2015), yet current theories do not provide a satisfactory  
25 explanation for how hallucinations and delusions tend to co-occur but sometimes manifest in  
26 isolation. This suggests that these psychotic symptoms may share a common neurobiological  
27 mechanism and simultaneously depend on symptom-specific pathways.

28 We and others have proposed that this apparent tension may be resolved in the context of  
29 *hierarchical* perceptual-inference models (Adams et al., 2013; Baker et al., 2019; Corlett et al.,  
30 2009; Corlett et al., 2018; Fletcher and Frith, 2009; Sterzer et al., 2018). One possibility is that  
31 alterations at higher levels—supporting inferences on abstract hidden states like someone’s  
32 intentions—may drive delusions, and alterations at lower levels—supporting inferences about  
33 lower-level features of stimuli such as stimulus presence or absence—may drive hallucinations  
34 (Baker et al., 2019; Davies et al., 2017; Horga and Abi-Dargham, 2019; Powers et al., 2017). In  
35 addition to these symptom-specific pathways, alterations at any level may naturally propagate

1 throughout the interdependent levels of the hierarchy (Chaudhuri et al., 2015), potentially  
2 explaining symptom co-occurrence. Importantly, neural systems supporting inference are thought  
3 to feature a hierarchical architecture of timescales that mirrors the hierarchical temporal dynamics  
4 of natural environments, where rapidly changing events are typically nested within slower  
5 changing contexts (Kiebel et al., 2008, 2009). Thus, higher-level inferences pertaining to slower  
6 changing contexts require neural systems with the ability to integrate information over longer  
7 periods, an ability consistent with the persistent neuronal activity that characterizes higher-level  
8 regions (Major and Tank, 2004; Mazurek et al., 2003).

9 A hierarchy of neural timescales is observed in both single-neuron recordings in non-human  
10 primates (Murray et al., 2014) and functional magnetic resonance imaging (fMRI) recordings in  
11 humans (Hasson et al., 2015; Hasson et al., 2008; Honey et al., 2012; Lerner et al., 2011;  
12 Stephens et al., 2013), and is recapitulated by a large-scale biophysical model (Chaudhuri et al.,  
13 2015). Furthermore, a newly developed method based on resting-state fMRI that was validated  
14 against electroencephalography (EEG) similarly captures a hierarchy of intrinsic neural  
15 timescales (INT), as well as alterations in psychopathology (Watanabe et al., 2019). Here, we  
16 specifically applied this fMRI measure to test whether hallucinations and delusions are associated  
17 with distinct changes of INT at low and high levels of neural hierarchies, respectively. We  
18 hypothesized that INT at these respective levels would increase with more severe symptoms,  
19 reflecting increased neural integration of prior information (Glaze et al., 2015; Mante et al., 2013;  
20 Mazurek et al., 2003), in line with behavioral findings in hallucinations and delusions (Baker et al.,  
21 2019; Cassidy et al., 2018; Powers et al., 2017). If present, these INT changes should manifest  
22 as symptom-specific differences in hierarchical gradients.

## 23 24 **Results**

25 INT maps were estimated as previously described (Watanabe et al., 2019) (**Materials and**  
26 **Methods**). Briefly, the autocorrelation function of the fMRI signal at each voxel (or vertex) was  
27 estimated and the sum of the autocorrelation coefficients during the initial positive period was  
28 calculated. This initial positive period included all timepoints from the current timepoint (zero lag)  
29 until the timepoint immediately preceding the first lagged timepoint with a non-positive  
30 autocorrelation coefficient. To adjust for differences in temporal resolution, the sum was multiplied  
31 by the repetition time (TR) of the fMRI data. This product was used as an index for INT (note that  
32 values are similar to those from an exponential fit (Murray et al., 2014); **Figure 1—figure**  
33 **supplement 1**). INT maps were parcellated using the HCP-multimodal parcellation (Glasser et al.,  
34 2016) to facilitate further analysis. Additionally, T1w/T2w (myelin) and cortical-thickness maps were  
35 obtained from high-resolution structural scans from the HCP database. Both of these structural  
36 measures have previously been shown to capture an underlying brain-wide hierarchy (Burt et al.,  
37 2018; Fischl et al., 2008; Wagstyl et al., 2015), consistent with the classic use of myeloarchitecture

1 and cytoarchitecture for cortical parcellation (Brodmann, 1909; Sarkissov et al., 1955; Vogt, 1911;  
2 Von Economo, 1929). In particular, Burt et al. (2018) validated T1w/T2w in macaques by showing  
3 strong agreement with a gold-standard tract-tracing measure of hierarchy. Establishing T1w/T2w  
4 and cortical thickness as structural indices of hierarchy in humans, Burt et al. validated these MRI  
5 measures against human postmortem gene-expression data (Hawrylycz et al., 2012)—specifically  
6 using granular layer-IV-specific gene expression as a proxy for cytoarchitecture structural type.

## 7 8 **Selection and Multimodal Validation of Neural Hierarchies**

9 Our hypothesis of symptom-specific INT differences in hierarchical gradients was agnostic to the  
10 specific neural hierarchies involved in psychosis, as the involvement of most sensory modalities  
11 has been reported (Lewandowski et al., 2009; Postmes et al., 2014). Consistent with prior empirical  
12 and theoretical work (Chaudhuri et al., 2015; Vázquez-Rodríguez et al., 2019), in a subset of 100  
13 unrelated young and healthy subjects from the HCP dataset, we did not observe a systematic  
14 relationship across the whole brain between INT (**Figure 1A**)—an index of functional hierarchy  
15 (Chaudhuri et al., 2015; Murray et al., 2014)—and the two indices of structural hierarchy (T1w/T2w  
16 and cortical thickness) (Burt et al., 2018; Fischl et al., 2008; Wagstyl et al., 2015) (**Figure 1—figure  
17 supplement 2**). We thus decided to focus on specific, well-studied hierarchies of the auditory,  
18 visual, and somatosensory systems that have been parcellated in humans, and where the  
19 functional and structural indexes of hierarchy appeared better aligned.

20 Despite ample anatomical investigation in primates, ambiguities in the definition of anatomical  
21 hierarchies in these sensory systems remain (Hilgetag et al., 1996; Kaas and Hackett, 2000) and  
22 have not been fully addressed in human MRI work. To address this issue, we used an anatomically  
23 informed, data-driven approach to determine the most suitable hierarchical orderings for each  
24 system. First, using the HCP dataset, we determined the hierarchical orderings of the sensory  
25 cortex parcels (auditory, visual, or somatosensory) by selecting the ordering that was best predicted  
26 by T1w/T2w and cortical thickness parcel-wise values for each system (i.e., the ordering for which  
27 these values explained the most variance). To enhance robustness, we specifically constrained  
28 this comparison to the four most plausible hierarchical orderings for each system based on previous  
29 anatomical studies (Felleman and Van, 1991; Galaburda and Pandya, 1983; Hyvärinen and  
30 Poranen, 1978; Morel et al., 1993). The winning orderings were A1 → LBelt → MBelt → PBelt →  
31 RI → A4 → A5 for the auditory cortex, V1 → V2 → V3 → MT → V4 → V6 → V7 for the visual cortex,  
32 and 3b → 3a → 1 → 2 → 5m → 7b → 7a for the somatosensory cortex (**Figure 1B**). Using the  
33 same approach to build upon these winning orderings and capture the broadest possible range of  
34 the hierarchies, we then determined the hierarchical position of two additional prefrontal cortex  
35 (PFC) regions known to be downstream projections of the auditory, visual, and somatosensory  
36 cortices: area 8a and area 46 (Felleman and Van, 1991; Kaas and Hackett, 2000). For all sensory  
37 systems, area 46 was selected as the highest hierarchical level (**Figure 1B**). Notably, each of the

1 PFC-extended winning models explained more variance than chance based on a null distribution  
 2 of 10,000 random orderings (auditory system:  $P_{\text{permutation}} < 10^{-4}$ ; visual system:  $P_{\text{permutation}} = 0.003$ ;  
 3 somatosensory system:  $P_{\text{permutation}} = 0.001$ ).

4

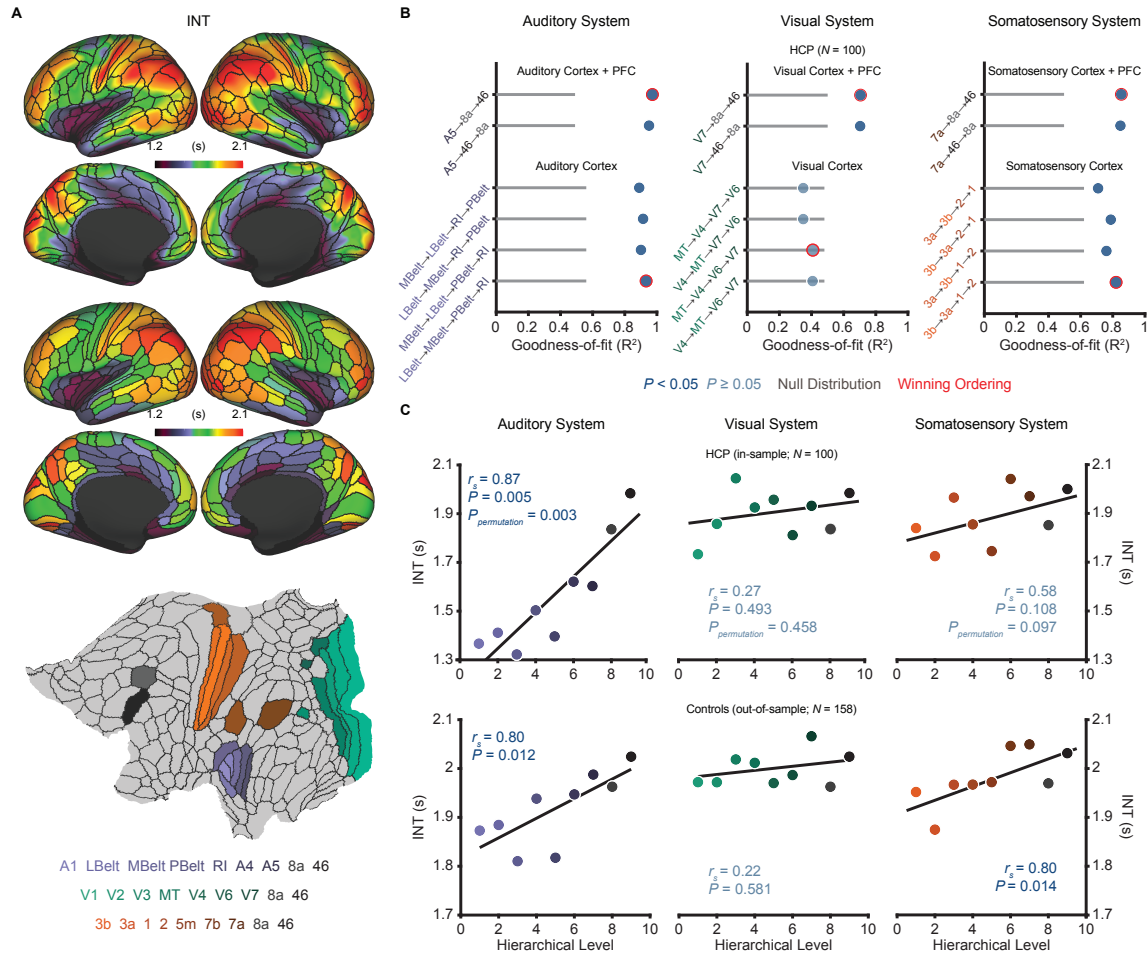

5

6 **Figure 1. Model comparison to determine the hierarchical orderings of auditory, visual, and somatosensory**

7 **systems. A) Group-averaged intrinsic neural timescale (INT) map from the Human Connectome Project (HCP) dataset (N**

8 **= 100; top), parcellated group-averaged INT map (middle), and flattened cortex showing the parcels in the auditory,**

9 **visual, and somatosensory hierarchies (winning hierarchies underneath; bottom). Color coding of parcels indicates their**

10 **anatomical location. B) Goodness-of-fit ( $R^2$ ) of linear mixed-effects models predicting different hierarchical orderings of the**

11 **auditory system (left), visual system (middle), and somatosensory system (right) from T1w/T2w and cortical thickness**

12 **values in the HCP dataset (Materials and Methods). First, the winning ordering (i.e., the model with the best goodness of**

13 **fit) for each system was determined for the 7 sensory cortex regions (bottom 4 models). Then, winning orderings were**

14 **determined for extended models with 2 downstream prefrontal cortex regions added to the respective winning models for**

15 **the sensory cortex (top 2 models). Note that, for each of the four considered orderings within the sensory cortex for each**

16 **system, only the 4 regions whose order is varied (out of 7 regions) are shown to delineate the models. For the auditory**

17 **cortex, A1 was always the lowest order region while A4 and A5 were always the two highest-order regions. For the visual**

18 **cortex, V1, V2, and V3 were always the three lowest order regions. For the somatosensory cortex, 5m, 7b, and 7a were**

19 **always the three highest order regions. Null distributions were generated by randomly permuting the hierarchical ordering**

20 **across all regions in a given hierarchy ( $0^{\text{th}}$  –  $95^{\text{th}}$  percentiles shown). C) Scatterplots showing INT values plotted as a**

1 function of hierarchical level for the PFC-extended winning models in **B** (red outline) for the HCP dataset (top) and the  
2 healthy control group in the schizophrenia combined dataset ( $N = 158$ ; bottom).

3  
4 We then evaluated whether these winning hierarchies—selected solely based on structural  
5 measures of hierarchy—were able to capture functional variability in the INT measure, such that  
6 higher levels exhibit longer INT. Within the HCP dataset, hierarchical position significantly  
7 correlated with INT in the auditory system ( $r_s = 0.87$ ,  $P = 0.005$ ; **Figure 1C**), and this correlation  
8 was above chance level based on a null distribution of 10,000 random orderings ( $P_{\text{permutation}} =$   
9  $0.003$ ). The hierarchical ordering was further validated in an out-of-sample group of 158 healthy  
10 controls from the schizophrenia combined dataset (**Materials and Methods**), where hierarchy  
11 similarly correlated with INT in the auditory system ( $r_s = 0.80$ ,  $P = 0.01$ ; **Figure 1C**). Positive but  
12 non-significant correlations were observed in the visual system (in-sample:  $r_s = 0.27$ ,  $P = 0.49$ ,  
13  $P_{\text{permutation}} = 0.47$ ; out-of-sample:  $r_s = 0.22$ ,  $P = 0.58$ ; **Figure 1C**). Stronger positive correlations were  
14 observed in the somatosensory system that reached significance in the out-of-sample group (in-  
15 sample:  $r_s = 0.58$ ,  $P = 0.108$ ,  $P_{\text{permutation}} = 0.097$ ; out-of-sample:  $r_s = 0.80$ ,  $P = 0.014$ ; **Figure 1C**).  
16 Despite the non-significant effects in the visual system (which surprisingly seemed to reflect less  
17 pronounced hierarchical gradients on all MRI measures, as suggested by the structural MRI  
18 gradients for all four tested orderings of the visual cortex falling within the null distribution; **Figure**  
19 **1B**), these data showed that the winning hierarchies captured functional INT gradients, at least in  
20 the auditory and somatosensory systems. As a third independent test of our winning hierarchies,  
21 we tested their ability to capture variability in cytoarchitecture structural type using human  
22 postmortem gene-expression data from the Allen Human Brain Atlas (Hawrylycz et al., 2012).  
23 Following prior work (Burt et al., 2018), we focused on the average expression of 5 genes  
24 preferentially expressed in granular layer IV, a cytoarchitectural marker that is more prominent in  
25 lower hierarchical levels. Consistent with this, expression of granular layer IV genes showed strong,  
26 negative correlations with hierarchical level in all three winning hierarchies (auditory:  $r_s = -0.88$ ,  $P$   
27  $= 0.003$ ; visual:  $r_s = -0.75$ ,  $P = 0.026$ ; somatosensory:  $r_s = 0.87$ ,  $P = 0.005$ ; **Figure 1—figure**  
28 **supplement 3**). Thus, we empirically validated extended sensory hierarchies that captured  
29 variability in hierarchical indices across three independent datasets, although this was generally  
30 less clear for the visual system.

### 31 32 **Assessment of Robustness and Reliability in the HCP Dataset**

33 Next, we set out to determine the robustness and reliability of INT. We focused on head motion, a  
34 common source of artifacts in fMRI data (Power et al., 2012). Head motion during data acquisition  
35 was associated with decreased INT values (181 out of 188 parcels,  $P_{\text{permutation}} = 0.01$ ; **Figure 1—**  
36 **figure supplement 4**). Yet these effects were comparable across hierarchical levels (auditory  
37 system:  $r_s = -0.23$ ,  $P_{\text{permutation}} = 0.805$ ; visual system:  $r_s = -0.38$ ,  $P_{\text{permutation}} = 0.649$ ; somatosensory  
38 system:  $r_s = -0.88$ ,  $P_{\text{permutation}} = 0.054$ ; **Figure 1—figure supplement 4**). No effects were observed

1 for gender or age (all  $P_{\text{permutation}} > 0.174$ ). Finally, INT maps showed excellent reliability between  
 2 the first and last 5 minutes of the fMRI acquisition (median ICC(2,1)  $\pm$  interquartile range across  
 3 voxels:  $0.94 \pm 0.03$ ; **Figure 1—figure supplement 5**).

4  
 5 **Table 1. Participant Characteristics**

| Variable                                    | Healthy Controls |             |             |             |             | Patients with Schizophrenia |             |             |             |             |
|---------------------------------------------|------------------|-------------|-------------|-------------|-------------|-----------------------------|-------------|-------------|-------------|-------------|
|                                             | BGS              | COBRE       | NMCH        | UCLA        | All         | BGS                         | COBRE       | NMCH        | UCLA        | All         |
| N                                           | 24               | 42          | 25          | 67          | 158         | 40                          | 31          | 26          | 30          | 127         |
| Age, mean (SD), y                           | 36.0 (13.1)      | 33.9 (10.4) | 29.8 (7.2)  | 32.3 (8.5)  | 32.9 (9.7)  | 31.1 (12.6)                 | 30.5 (11.9) | 30.5 (6.2)  | 35.0 (8.9)  | 31.8 (10.6) |
| Male sex, No. (%)                           | 22 (92)          | 34 (81)     | 16 (64)     | 54 (81)     | 126 (80)    | 38 (95)                     | 26 (84)     | 19 (73)     | 22 (73)     | 105 (83)    |
| Framewise Displacement*, mean (SD), mm      | 0.15 (0.04)      | 0.14 (0.05) | 0.14 (0.11) | 0.10 (0.04) | 0.13 (0.06) | 0.16 (0.06)                 | 0.17 (0.06) | 0.12 (0.06) | 0.13 (0.04) | 0.15 (0.06) |
| Delusion Score, mean (SD)                   | NA               | NA          | NA          | NA          | NA          | 2.3 (1.6)                   | 1.7 (1.5)   | 3.2 (1.9)   | 2.5 (1.4)   | 2.4 (1.7)   |
| Hallucination Score, mean (SD)              | NA               | NA          | NA          | NA          | NA          | 2.1 (1.6)                   | 1.7 (1.4)   | 2.9 (2.0)   | 2.2 (1.6)   | 2.2 (1.7)   |
| Conceptual Disorganization Score, mean (SD) | NA               | NA          | NA          | NA          | NA          | 0.9 (1.3)                   | 0.6 (1.0)   | 2.0 (1.6)   | 1.4 (1.4)   | 1.2 (1.4)   |
| Emotional Withdrawal Score, mean (SD)       | NA               | NA          | NA          | NA          | NA          | 1.8 (1.2)                   | 1.2 (1.3)   | 3.4 (1.7)   | 2.3 (1.5)   | 2.1 (1.6)   |
| Social Withdrawal Score, mean (SD)          | NA               | NA          | NA          | NA          | NA          | 1.8 (1.4)                   | 1.3 (1.4)   | 3.2 (1.7)   | 2.7 (1.6)   | 2.2 (1.6)   |
| Blunted Affect Score, mean (SD)             | NA               | NA          | NA          | NA          | NA          | 1.8 (1.6)                   | 1.6 (1.5)   | 3.3 (1.6)   | 1.1 (1.1)   | 1.9 (1.6)   |
| Alogia Score, mean (SD)                     | NA               | NA          | NA          | NA          | NA          | 1.3 (1.6)                   | 1.2 (1.4)   | 2.1 (1.7)   | 0.9 (1.6)   | 1.3 (1.6)   |

6 \*Framewise Displacement values were estimated after motion-scrubbing  
 7 BGS, BrainGluSchi; NMCH, NMorphCH; SD, standard deviation  
 8

### 9 Exploratory Analyses of Intrinsic Neural Timescales in Schizophrenia versus Health

10 Although our primary hypothesis dealt with hierarchical differences between hallucinations and  
 11 delusions, we first present exploratory analyses of diagnosis effects on INT. **Table 1** lists the  
 12 participant characteristics. Compared to controls ( $N = 158$ ), patients ( $N = 127$ ) exhibited a small-  
 13 to-moderate, but widespread, reduction of INT (98 out of 188 parcels,  $P_{\text{permutation}} = 0.013$ ; **Figure**  
 14 **2E**). A voxel-wise analysis observed a similar result (**Figure 2—figure supplement 1**). However,  
 15 the INT reductions in patients were comparable across hierarchical levels (all  $P_{\text{permutation}} > 0.40$ ;  
 16 **Figure 2F**). *In silico* simulations using a large-scale biophysical model (Chaudhuri et al., 2015)  
 17 suggested that the global INT reduction in patients could be neuronally implemented by globally  
 18 reduced excitation-inhibition (E/I) ratio (**Figure 2—figure supplement 2**).

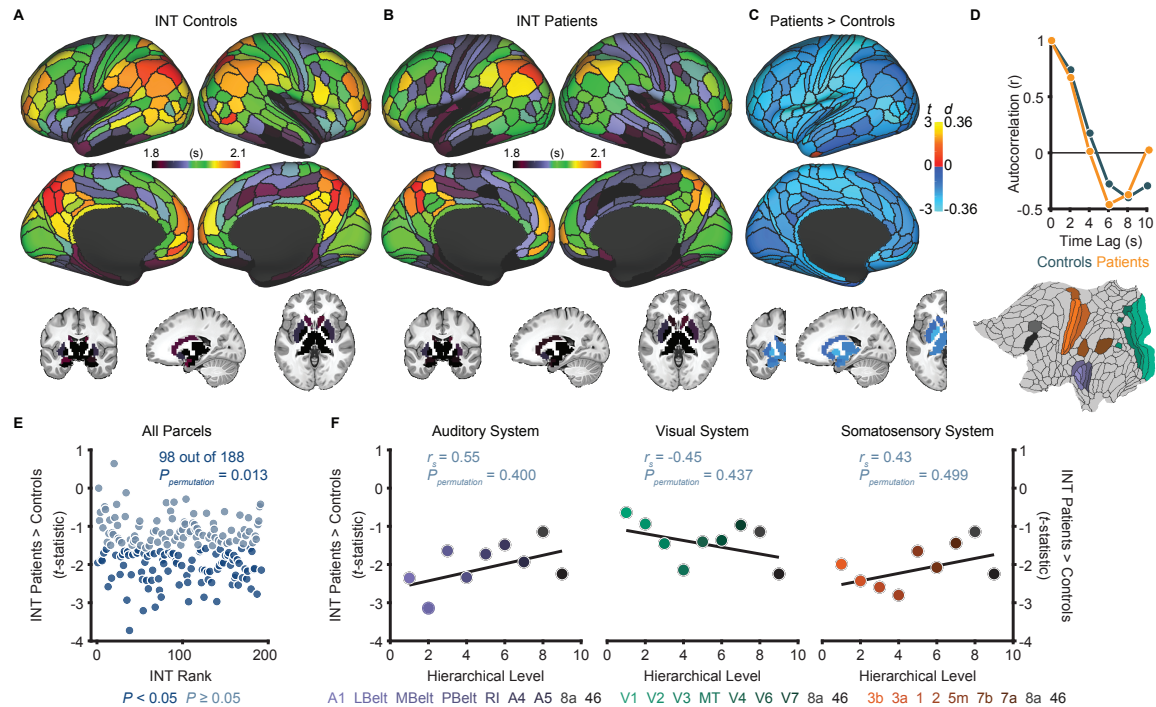

1  
2 **Figure 2. Exploratory analyses show that patients with schizophrenia exhibit widespread reductions of intrinsic**  
3 **neural timescales compared to healthy controls. A)** Parcellated group-averaged intrinsic neural timescale (INT) map  
4 for healthy controls ( $N = 158$ ). **B)** Parcellated group-averaged INT map for patients with schizophrenia ( $N = 127$ ). **C)**  $t$ -  
5 statistic (Cohen's  $d$ ) map showing the contrast of patients greater than controls. Across most parcels, INT is shorter in  
6 patients than controls in a regression model ( $M1_{\text{exploratory}}$ ; **Materials and Methods**) controlling for age, gender, framewise  
7 displacement, and data-collection site (overall effect of diagnosis: 98 out of 188 parcels,  $P_{\text{permutation}} = 0.013$ ). Only the left  
8 hemisphere is shown because statistical analyses were performed after averaging the values in each parcel across the  
9 left- and right-hemispheres. **D)** To illustrate the effect of reduced INT in patients with schizophrenia, the group-averaged,  
10 whole-brain-averaged autocorrelation functions were estimated from subjects with fMRI data acquired with the same  
11 repetition time (top; controls:  $N = 132$ ; patients:  $N = 101$ ). The group-averaged autocorrelation function for patients  
12 crosses the zero point on the y-axis (i.e., autocorrelation coefficient = 0) sooner than in controls, demonstrating the global  
13 reduction of INT in patients. The flattened cortex shows the parcels in the auditory, visual, and somatosensory hierarchies  
14 for reference (bottom). **E)** Scatterplot showing  $t$ -statistic values for group differences from the regression model  
15 ( $M1_{\text{exploratory}}$ ), plotted as a function of the INT rank (determined from the group-averaged INT map from HCP subjects).  
16 Each datapoint represents one parcel. **F)** Scatterplots showing  $t$ -statistic values from parcels within the auditory (left),  
17 visual (middle), and somatosensory (right) hierarchies plotted as a function of hierarchical level. No hierarchical-gradient  
18 effects for schizophrenia diagnosis were observed.

## 19 20 **Hierarchical Differences in Intrinsic Neural Timescales Between Hallucinations and** 21 **Delusions**

22 Our *a priori* hypothesis was that hallucinations and delusions were associated with alterations of  
23 INT at different hierarchical levels, leading to distinct changes in hierarchical gradients. To test this,  
24 we determined the unique variance associated with the effect of interindividual variability in  
25 hallucination and delusion severity on INT ( $M1_{\text{primary}}$ ; **Materials and Methods**). As expected,  
26 severity of hallucinations and delusions in our sample were correlated ( $r_s = 0.62$ ,  $P < 0.01$ ) but had



1 sufficient unique variance  $[(1 - R^2) = 0.62]$  to evaluate their independent contributions. The severity  
2 of these symptoms was uncorrelated with antipsychotic dose among the 109 patients with available  
3 data (chlorpromazine equivalents: both  $P > 0.86$ ), making medication an unlikely confound (**Figure**  
4 **3—figure supplement 1**).

5 The main model (M2; **Materials and Methods**) we used as a primary test of main effects and  
6 interactions of symptoms on hierarchical INT gradients—which also included interaction terms for  
7 each sensory system to account for between-system differences—was significant (omnibus  $F_{11,41}$   
8 = 5.52,  $P < 10^{-4}$ ). Critically, within this model we found hierarchical-gradient effects that differed  
9 significantly between hallucinations and delusions in the expected directions for 2/3 systems  
10 (auditory system, symptom-by-hierarchical-level interaction:  $t_{42} = 4.59$  [95% bootstrap confidence  
11 interval: 3.39, 9.08], Cohen's  $f^2 = 1.00$ ,  $P_{\text{permutation}} = 0.001$ ; visual:  $t_{42} = -2.06$  [-6.19, 0.16],  $f^2 = 0.11$ ,  
12  $P_{\text{permutation}} = 0.083$ ; and somatosensory:  $t_{42} = 3.50$  [2.19, 7.35],  $f^2 = 0.41$ ,  $P_{\text{permutation}} = 0.011$ ; **Figure**  
13 **3**). In the auditory system, this interaction was driven by significant hierarchical-gradient effects in  
14 opposite directions for hallucinations (hierarchical-level effect:  $t_{42} = -3.50$  [-8.42, -2.24],  $f^2 = 0.41$ ,  
15  $P_{\text{permutation}} = 0.010$ ) and delusions (hierarchical-level effect:  $t_{42} = 2.99$  [1.18, 6.37],  $f^2 = 0.27$ ,  $P_{\text{permutation}}$   
16 = 0.025). In the somatosensory system, this effect was driven by a trend-level negative hierarchical-  
17 gradient effect for hallucinations (hierarchical-level effect:  $t_{42} = -2.35$  [-5.91, -1.00],  $f^2 = 0.15$ ,  
18  $P_{\text{permutation}} = 0.056$ ) and a significant positive hierarchical-gradient effect for delusions (hierarchical-  
19 level effect:  $t_{42} = 2.60$  [1.43, 5.57],  $f^2 = 0.19$ ,  $P_{\text{permutation}} = 0.042$ ; **Figure 3**). In the visual system,  
20 hierarchical-gradient effects were not significant for either symptom (hallucination hierarchical-level  
21 effect:  $t_{42} = 0.90$  [-1.06, 3.62],  $f^2 = 0.00$ ,  $P_{\text{permutation}} = 0.466$ ; delusion hierarchical-level effect:  $t_{42} = -$   
22 2.01 [-6.01, 0.53],  $f^2 = 0.11$ ,  $P_{\text{permutation}} = 0.087$ ). We also found significant three-way interactions  
23 with sensory system, indicating differences in the symptom interactions between the visual and the  
24 other systems (see statistics in **Figure 3B**), but these were not *a priori* tests (see also **Discussion**  
25 for issues of interpretability). Examining the significant symptom effects further, in the auditory  
26 system we observed that patients with high-severity hallucinations exhibited a numeric increase in  
27 INT at lower levels of the hierarchy relative to those with low-severity hallucinations, leading to a  
28 compression of the INT hierarchical gradient (**Figure 3C**); in contrast, in both the auditory and  
29 somatosensory systems, patients with high-severity delusions exhibited a numeric increase in INT  
30 at higher levels of the hierarchy relative to those with low-severity delusions, leading to a more  
31 pronounced INT hierarchical gradient.

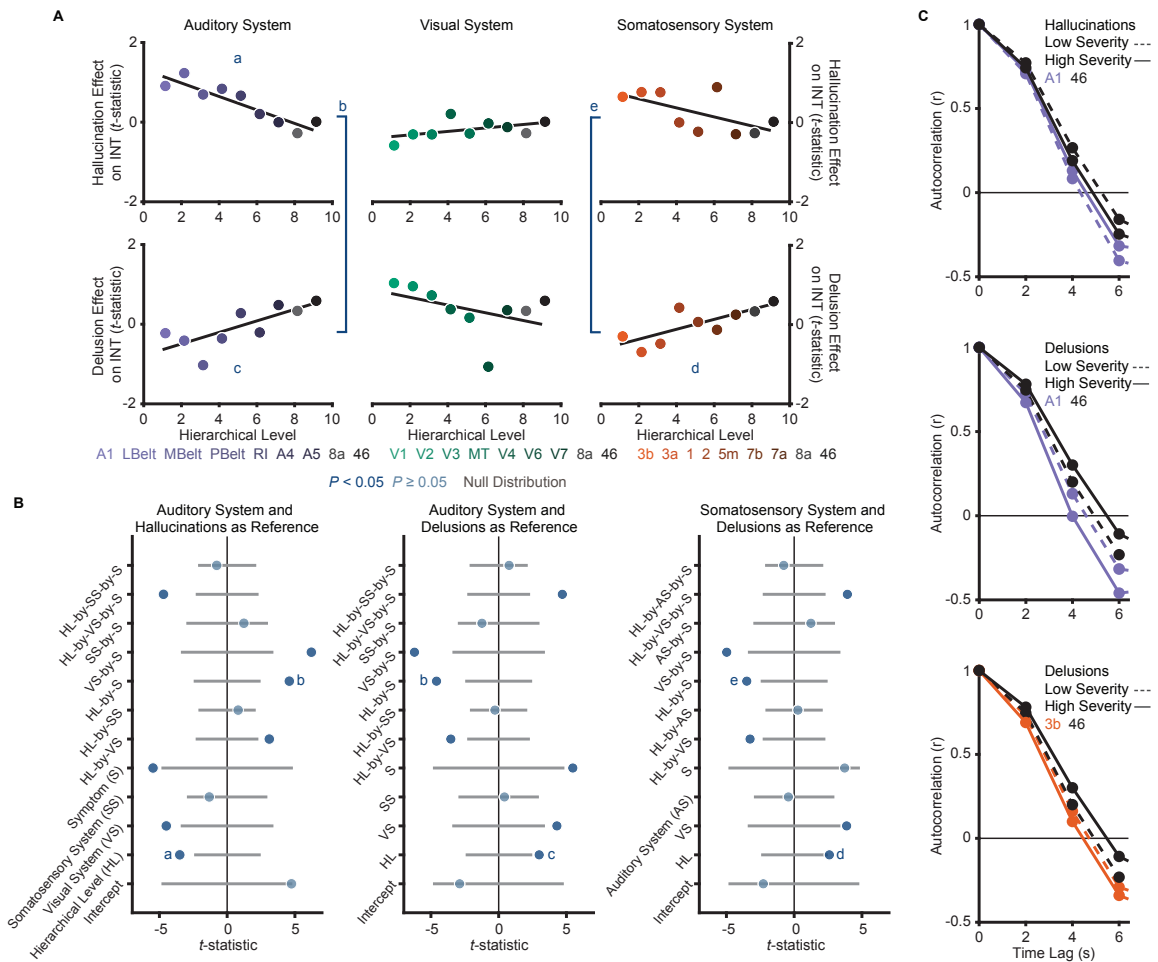

1  
2 **Figure 3. A priori analyses show that hallucinations and delusions exhibit distinct hierarchical-gradient effects on**  
3 **intrinsic neural timescales in the auditory and somatosensory systems. A)** Scatterplots showing *t*-statistic values  
4 from a regression model (M1<sub>primary</sub>; **Materials and Methods**) including all 7 symptoms and controlling for age, gender,  
5 framewise displacement, and data-collection site for hallucination-severity (top) and delusion-severity (bottom) effects  
6 from parcels within the auditory (left), visual (middle), or somatosensory (right) systems plotted as a function of  
7 hierarchical level (using PFC-extended winning hierarchies; **Figure 1**). **B)** Summary of results from a model (M2;  
8 **Materials and Methods**) including symptom-severity effect (hallucinations or delusions), hierarchical level, sensory  
9 system (auditory, visual, or somatosensory), and their interactions. These results demonstrate: (1) in the auditory system,  
10 a significant difference in the relationship between hallucination severity and hierarchical level versus that for delusion  
11 severity and hierarchical level (b); (2) in the auditory system, significant hierarchical-gradient effects of hallucination  
12 severity (a) and delusion severity (c); (3) in the somatosensory system, a significant difference in the relationship between  
13 hallucination severity and hierarchical level versus that for delusion severity and hierarchical level (e); and (4) in the  
14 somatosensory system, a significant hierarchical-gradient effect of delusion severity (d). Note that different symptoms and  
15 systems were used as references (implicit variable) across three plots to show each of the relevant effects which were  
16 tested within a single model (M2). Null distributions were generated by randomly permuting symptom-severity scores  
17 across patients in M1<sub>primary</sub> (2.5<sup>th</sup> – 97.5<sup>th</sup> percentiles shown). **C)** To illustrate the effects, the group-averaged  
18 autocorrelation functions were estimated from subjects with fMRI data acquired with the same repetition time (*N* = 10 for  
19 each group). High severity patients were the 10 subjects with the highest residual symptom scores after regressing out all  
20 other symptoms; low severity patients were the 10 subjects with the lowest residual symptom scores. The group-averaged  
21 autocorrelation functions are shown for high-severity (solid lines) and low-severity (dashed lines) hallucination patients

1 from low and high levels of the auditory hierarchy (A1 and area 46, top). The group-averaged autocorrelation functions are  
2 also shown for high-severity and low-severity delusion patients from low and high levels of the auditory hierarchy (middle).  
3 The group-averaged autocorrelation functions are finally shown for high-severity and low-severity delusion patients from  
4 low and high levels of the somatosensory hierarchy (area 3b and area 46, bottom). These plots depict a compression of  
5 the auditory hierarchical gradient in high-severity hallucination patients and, instead, an expansion of both the auditory  
6 and somatosensory hierarchical gradients in high-severity delusion patients.

7  
8 To correct for multiple comparisons, we carried out a family-wise permutation test determining  
9 the probability of spuriously obtaining the set of significant *a priori* effects we observed in support  
10 of our original hypothesis. Based on the chance level of jointly observing negative hierarchical-  
11 gradient effects for hallucination severity in at least 1/3 systems, *and* positive hierarchical-gradient  
12 effects for delusion severity in at least 2/3 systems, *and* interaction effects of hierarchy-by-symptom  
13 in the expected direction in at least 2/3 systems, this analysis suggested that the observed set of  
14 results was statistically above chance (set-level  $P_{permutation} = 0.014$ ). Furthermore, based on the  
15 chance level of observing a significant negative hierarchical-gradient effect for hallucinations, *and*  
16 a significant positive hierarchical-gradient effect for delusions, *and* a significant symptom-by-  
17 hierarchical-level interaction (i.e., all 3 effects in one system), the observed set of results in the  
18 auditory system was also statistically above chance (set-level  $P_{permutation} = 0.043$ ).

19 To rule out an effect of our approach for selecting hierarchical orderings on these results, we  
20 tested these symptom effects for each of the 4 different sensory-cortex hierarchical orderings  
21 considered *a priori* candidates for each sensory system. Results were generally consistent across  
22 the different hierarchical orderings (**Figure 3—figure supplement 2**), particularly in the auditory  
23 system. A family-wise permutation test similar to the one above, but including all 4 orderings per  
24 system (12 total orderings), showed that the observed set of results was statistically above chance  
25 for all systems (set-level  $P_{permutation} = 0.002$ ) and for the auditory system alone (set-level  $P_{permutation}$   
26 = 0.001).

### 27 28 **Post-Hoc Analysis of the Specificity of INT Hierarchical-Gradient Effects**

29 In a post-hoc analysis, we then investigated the specificity of these hierarchical-gradient effects to  
30 the positive psychotic symptoms under investigation. To this end, we determined hierarchical-  
31 gradient effects individually for each symptom in the auditory and somatosensory systems using a  
32 model including symptom-severity effect (only one symptom), hierarchical level, sensory system  
33 (auditory, visual, and somatosensory), and their interactions. In the auditory system, conceptual  
34 disorganization was the only symptom—other than hallucinations and delusions—that showed a  
35 significant effect (hierarchical-level effect:  $t_{21} = -2.80$  [-5.31, -1.10],  $f^2 = 0.60$ ,  $P_{permutation} = 0.036$ ;  
36 **Figure 3—figure supplement 3**). But this effect was weaker than that for hallucinations  
37 (hierarchical-level effect:  $t_{21} = -4.38$  [-10.31, -3.28],  $f^2 = 10.57$ ,  $P_{permutation} = 0.005$ ; **Figure 3—figure**  
38 **supplement 3**). These results thus suggest some specificity to positive symptoms, which  
39 conceptual disorganization is classically defined as (Association, 2013; VandenBos, 2007) (but see

1 (van der Gaag et al., 2006)), consistent with a stronger correlation of conceptual disorganization  
2 with positive symptoms (average  $r_s = 0.48$ ) versus negative symptoms (average  $r_s = 0.23$ ) in our  
3 sample. Indeed, a permutation test comparing the average strength of hierarchical-gradient effects  
4 (i.e., mean absolute  $t$ -statistics) for positive versus negative symptoms (i.e., blunted affect, social  
5 withdrawal, emotional withdrawal, and alogia) showed the effects of positive symptoms to be  
6 significantly larger than the effects of negative symptoms ( $P_{\text{permutation}} = 0.043$ ). In the somatosensory  
7 system, no symptoms other than delusions showed a significant hierarchical-gradient effect.  
8 Hallucinations however showed the strongest negative effect (hierarchical-level effect:  $t_{21} = -2.23$   
9  $[-6.79, -1.75]$ ,  $f^2 = 0.31$ ,  $P_{\text{permutation}} = 0.079$ ; **Figure 3—figure supplement 3**).

10 Thus, although the hierarchical-gradient effects were not unique to the two symptoms under  
11 investigation—which is not required under perceptual-inference models of psychosis and which  
12 could suggest model extensions to account for additional phenomena—these effects were  
13 strongest for, and relatively specific to, positive symptoms.

### 14 **Altered E/I Ratio as a Potential Biological Mechanism**

15 To explore candidate biological mechanisms for the effects we observed *in vivo*, we leveraged a  
16 large-scale biophysical model previously shown to capture intrinsic timescale hierarchies  
17 (Chaudhuri et al., 2015). This model depicts the macaque cortex using 29 recurrently connected  
18 cortical nodes, with connection strengths based on macaque tract-tracing studies (**Figure 4B**).  
19 Given growing evidence for E/I imbalance in schizophrenia (Foss-Feig et al., 2017; Jardri et al.,  
20 2016) and the hypothesized local increases of INT, we fit the biophysical model to our data to  
21 explore whether our results could be driven by local increases in E/I ratio. These E/I ratio changes  
22 were modeled as a triangle function where a local maximum exhibited a peak E/I ratio increase and  
23 other nodes had E/I ratio changes that decreased linearly as a function of absolute distance in  
24 hierarchical levels from the peak. This function was described by 3 free parameters: (i) the  
25 hierarchical level of the peak E/I ratio increase, (ii) the magnitude of the E/I ratio increase at the  
26 peak, and (iii) the magnitude of the E/I ratio change at the minimum (i.e., at the hierarchical level  
27 furthest from the peak).

28 To fit the biophysical model, we first estimated *in vivo* data for “exemplary cases” using  
29 regression fits from  $M1_{\text{primary}}$  (**Materials and Methods**) in the auditory system—the system that  
30 showed the strongest effects. The regression fits allowed us to estimate INT values at each level  
31 of the hierarchy for “exemplary cases” representative of extreme symptom profiles (while controlling  
32 for variability in other factors). INT values for the auditory hierarchy were estimated for 4 exemplary  
33 cases: (1) no hallucinations or delusions (fitted INT values from  $M1_{\text{primary}}$  with minimum scores of 0  
34 for both symptoms); (2) hallucinations only (maximum score of 5 for hallucinations and score of 0  
35 for delusions); (3) delusions only (scores of 0 for hallucinations and 5 for delusions); (4)  
36 hallucinations and delusions (scores of 5 for both symptoms). For all exemplary cases, the severity  
37

1 of other symptoms and the values of covariates were set to the average values from all patients.  
2 Changes of INT for exemplary cases 2–4 were determined as the difference in INT relative to the  
3 ‘no hallucinations or delusions’ case (*in vivo*  $\Delta$ INT; **Figure 4A**). We modeled the *in vivo*  $\Delta$ INT in the  
4 auditory system using the macaque visual system as a model hierarchy with realistic biological  
5 constraints due to the lack of tract-tracing data for the auditory system; note that sensory system  
6 and species differences limit our ability to derive precise quantitative conclusions from the modeling  
7 results but still afford qualitative insights. We specifically used the 6 biophysical-model nodes that  
8 directly corresponded to levels of our visual hierarchy and for which tract-tracing data were  
9 available: V1 (level 1), V2 (level 2), V4 (level 4), MT (level 5), 8l (level 8), and 46d (level 9). Model-  
10 derived *in silico*  $\Delta$ INT (**Figure 4C**) were calculated for each node as the difference in INT from the  
11 biophysical model with no perturbations (‘unaltered model’) and the INT from the best-fitting  
12 biophysical model for which the values of the parameters controlling the E/I ratio provided the  
13 closest approximation to the *in vivo*  $\Delta$ INT across exemplary cases (in the 6 corresponding parcels  
14 of our auditory hierarchy: A1 [level 1], LBelt [level 2], PBelt [level 4], RI [level 5], 8a [level 8], and  
15 46 [level 9]). Specifically, two sets of the 3 E/I ratio parameters were jointly fitted to exemplary  
16 cases 2–4, one for hallucinations and one for delusions, with the combined effect from the sum of  
17 the E/I ratio changes for the two individual symptoms.

18 *In silico* results using the best-fitting parameters were able to recapitulate the INT effects of  
19 hallucinations and delusions (compression versus expansion of the INT hierarchical gradient,  
20 respectively) via local increases in E/I ratio at low or high levels of the hierarchy, respectively.  
21 Specifically, the best-fitting levels of the peak increase in local E/I ratio were levels 1 and 8 for  
22 hallucinations and delusions, respectively (**Figure 4D**). Interestingly, given the relatively greater  
23 strength of both recurrent and long-range connections at higher levels that is built into the  
24 biophysical model, the required peak E/I ratio increase to achieve the observed changes of INT  
25 was considerably smaller for the delusion-related alteration at level 8 ( $\Delta$ E/I = 4.02%) compared to  
26 the hallucination-related alteration at level 1 ( $\Delta$ E/I = 21.61%). Also, the *in silico*  $\Delta$ INT based on the  
27 summed E/I ratio alterations for individual symptoms closely approximated the combined case of  
28 hallucinations and delusions (exemplary case 4), which consisted of a general increase in INT with  
29 no clear change in the hierarchical gradient. This suggests that additivity of the local symptom-  
30 specific alterations could explain symptom co-occurrence.

31

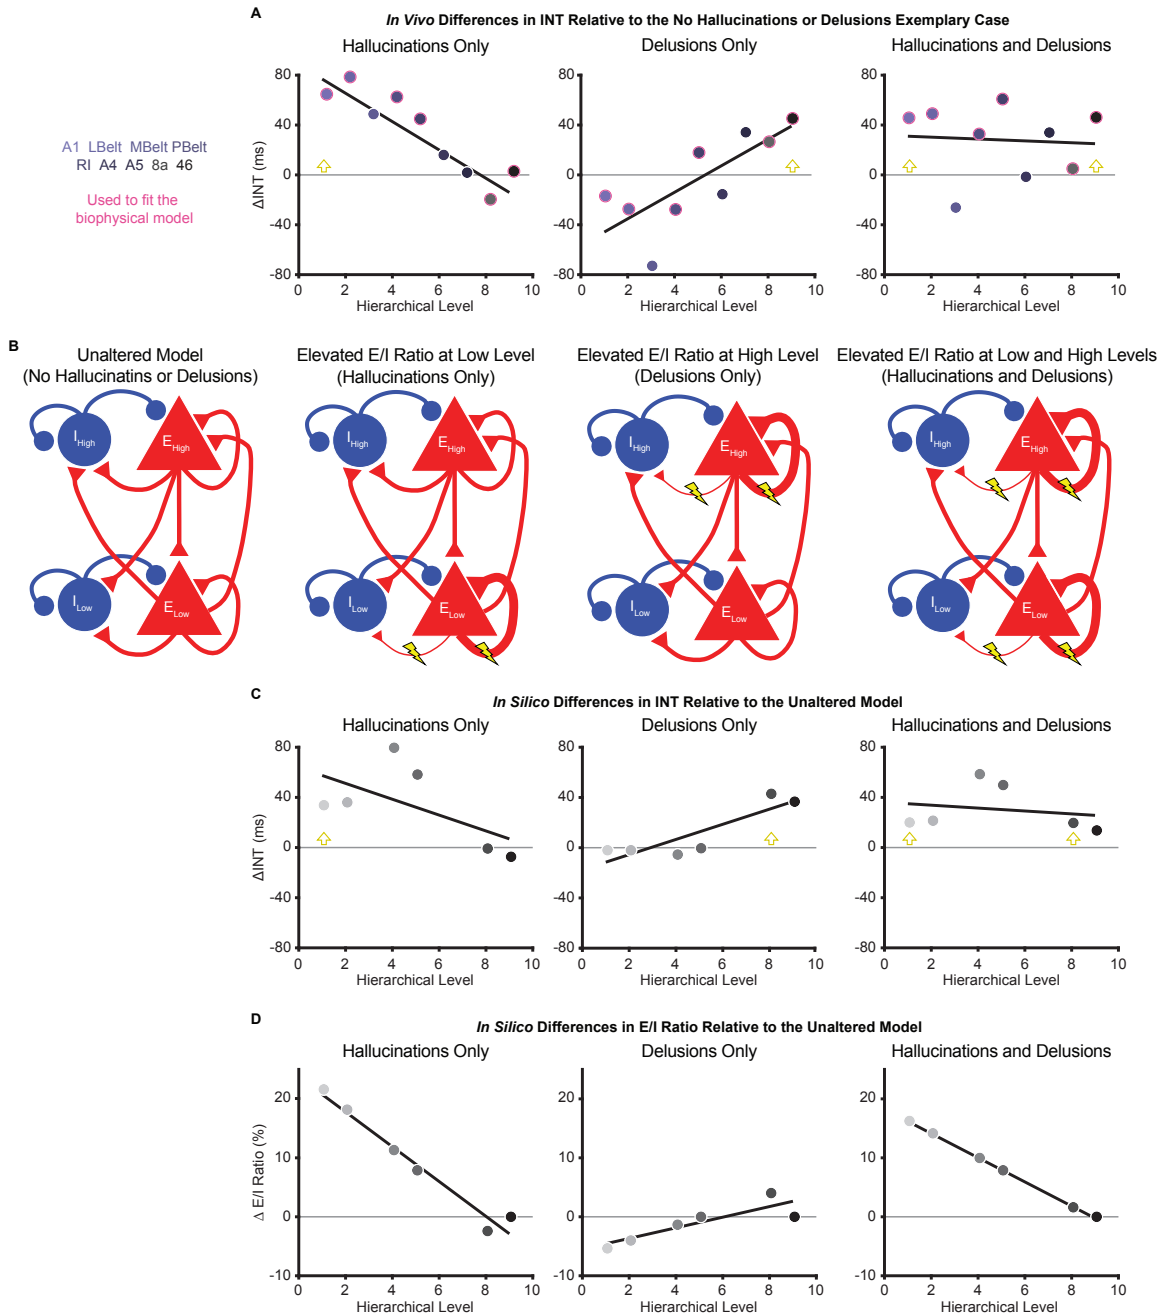

1  
2  
3  
4  
5  
6  
7  
8  
9  
10  
11

**Figure 4. Hallucination and delusion effects on INT are recapitulated by elevated excitatory-inhibitory (E/I) ratios at different hierarchical levels.** **A)** Scatterplots showing the difference in estimated INT values between the 3 exemplary cases capturing extreme symptom profiles ('hallucinations only', 'delusions only', and 'hallucinations and delusions') with respect to the 'no hallucinations or delusions' exemplary case (*in vivo*  $\Delta$ INT; fitted parcel-wise data from M1<sub>primary</sub>). The parcel data used for fitting the biophysical model are outlined in pink. Yellow arrowheads denote the hypothesized hierarchical level of the maximum E/I ratio increase. **B)** Simplified schematic of a large-scale biophysical model of the macaque cortex and its variants (**Materials and Methods**). The model consists of 29 nodes with local excitatory (red triangles) and inhibitory (blue circles) pools of neurons; only two nodes—high (top) and low (bottom) hierarchical levels—are shown for illustrative purposes. These nodes have both local (recurrent) and long-range (across-node) connections. **C)** Scatterplots showing the difference in estimated INT values between the 3 exemplary cases capturing extreme symptom profiles ('hallucinations only', 'delusions only', and 'hallucinations and delusions') with respect to the 'no hallucinations or delusions' exemplary case (*in silico*  $\Delta$ INT; fitted parcel-wise data from M1<sub>primary</sub>). The parcel data used for fitting the biophysical model are outlined in pink. Yellow arrowheads denote the hypothesized hierarchical level of the maximum E/I ratio increase. **D)** Scatterplots showing the difference in estimated E/I ratios between the 3 exemplary cases capturing extreme symptom profiles ('hallucinations only', 'delusions only', and 'hallucinations and delusions') with respect to the 'no hallucinations or delusions' exemplary case (*in silico*  $\Delta$ E/I Ratio; fitted parcel-wise data from M1<sub>primary</sub>). The parcel data used for fitting the biophysical model are outlined in pink. Yellow arrowheads denote the hypothesized hierarchical level of the maximum E/I ratio increase.

1 the auditory cortex—other levels of the visual cortex are omitted for the same reason—but the qualitative pattern of results  
2 applies to hierarchical-gradient effects in any given sensory system. Lightning bolts mark theoretical perturbations to the  
3 model. Thicker or thinner lines with respect to the reference scenario reflect increased or decreased connection strengths,  
4 respectively. Note that E/I ratio can be increased either by increasing local excitatory-excitatory connection strength or by  
5 decreasing local excitatory-inhibitory connection strength, but these scenarios were tested individually. **C)** Scatterplots  
6 showing the difference in simulated INT values between each of the 3 pathological biophysical models ('elevated E/I ratio  
7 at low level', 'elevated E/I ratio at high level', and 'elevated E/I ratio at low and high levels') with respect to the reference  
8 biophysical model ('unaltered model') using the best-fitting E/I ratio parameters (*in silico*  $\Delta$ INT). By allowing the E/I ratios  
9 to vary, the biophysical model can recapitulate the *in vivo* INT changes with a negative (compressed) hierarchical-gradient  
10 effect for hallucinations, a positive (expanded) hierarchical-gradient effect for delusions, and an overall INT increase  
11 (without a manifest hierarchical-gradient effect) for the combined case of hallucinations and delusions. Yellow arrowheads  
12 denote the hierarchical level of the maximum E/I ratio increase. **D)** Scatterplots showing the fitted changes to E/I ratios for  
13 the pathological biophysical models: the *in vivo* INT changes associated with hallucinations can be recapitulated by  
14 elevated E/I ratio at the lowest hierarchical level and those associated with delusions by elevated E/I ratio (of smaller  
15 magnitude) at the highest hierarchical level, with the addition of these two alterations capturing the changes in patients  
16 with both hallucinations and delusions. Note that E/I ratio in level 9 of the hierarchy was fixed to its value in the unaltered  
17 model to prevent model instability (**Materials and Methods**).

18  
19 In a follow-up analysis, we further explored our *in vivo* data for evidence of the additive effect  
20 of hallucinations and delusions, focusing on the auditory system. We first compared the average  
21 INT across all auditory system parcels between patients with both high hallucination and delusion  
22 scores (i.e., raw average data from subjects with a score of 5 for both symptoms;  $N = 11$ ) and  
23 patients with neither hallucinations nor delusions (i.e., subjects with a score of 0 for both symptoms;  
24  $N = 18$ ). Here, we observed significantly higher average INT in patients with high-severity  
25 hallucinations and delusions ( $t_{27} = 1.84$ ,  $P = 0.038$ ; one-tailed two-sample t-test). Second, we fit a  
26 linear model predicting auditory parcel INT as a function of hierarchical level, allowing separate  
27 intercepts for each of the two groups, and an interaction between hierarchical level and group.  
28 Here, we found that the intercept was indeed higher for patients with high-severity hallucinations  
29 and delusions compared to patients with neither symptom ( $t_{257} = 2.04$ ,  $P = 0.043$ ). Furthermore, we  
30 found no difference in the hierarchical gradients between these groups, with a non-significant  
31 hierarchical-level-by-group interaction ( $t_{257} = 0.65$ ,  $P = 0.519$ ). Although preliminary, these results  
32 supply some support for the notion of additive hierarchical alterations in psychosis.

### 34 **Control Analyses Examining Alternative Definitions of Auditory Hierarchies**

35 Given that the hierarchical-gradient effects supporting our initial hypotheses were clearest in the  
36 auditory system—a system thought to comprise dual processing streams—we considered the  
37 impact of alternative definitions of the auditory hierarchy on our results.

38 Diverging auditory streams with downstream projections to dorsal (areas 8a and 46) versus  
39 ventral (areas 10 and 12vl) PFC have been described (Kaas and Hackett, 2000). We thus  
40 conducted an ordering-selection analysis for the ventral stream, like that presented above for the  
41 dorsal stream (**Selection and Multimodal Validation of Neural Hierarchies**). Within the ventral

1 stream, area 12vl was better predicted as the highest hierarchical level, and the winning ordering  
2 explained more variance than chance based on a null distribution of random orderings (ventral  
3 auditory system:  $P_{\text{permutation}} < 10^{-4}$ ; **Figure 1—figure supplement 6A**). Furthermore, similar to the  
4 dorsal stream, hierarchical level in the ventral stream correlated with INT (in-sample:  $r_s = 0.87$ ,  $P =$   
5  $0.005$ ,  $P_{\text{permutation}} = 0.003$ ; out-of-sample:  $r_s = 0.80$ ,  $P = 0.014$ ; **Figure 1—figure supplement 6B**).  
6 Given these dual auditory streams and the corresponding validated hierarchies, we explored  
7 potential differences in hierarchical-gradient effects for hallucination and delusion severity for the  
8 dorsal versus ventral streams. The model explaining symptom effects and their differences by  
9 hierarchical level and their interaction by symptoms and auditory stream was significant (omnibus  
10  $F_{7,27} = 8.60$ ,  $P < 10^{-4}$ ). We further found a significant difference in the symptom-by-hierarchical-level  
11 effects between the dorsal and ventral auditory streams (symptom-by-hierarchical-level-by-  
12 processing-stream interaction:  $t_{28} = 1.75$  [1.02, 3.90],  $f^2 = 0.12$ ,  $P_{\text{permutation}} = 0.005$ ; **Figure 3—figure**  
13 **supplement 4**). In the ventral stream, we did not find a significant difference in the hierarchical-  
14 gradient effects between hallucinations and delusions (symptom-by-hierarchical-level interaction:  
15  $t_{28} = 2.01$  [-0.37, 6.43],  $f^2 = 0.17$ ,  $P_{\text{permutation}} = 0.159$ ; **Figure 3—figure supplement 4**); we found a  
16 trend-level hierarchical-gradient effect of hallucination severity (hierarchical-level effect:  $t_{28} = -2.56$   
17 [-7.04, -0.73],  $f^2 = 0.31$ ,  $P_{\text{permutation}} = 0.098$ ; **Figure 3—figure supplement 4**) and no effect of  
18 delusion severity (hierarchical-level effect:  $t_{28} = 0.28$  [-2.42, 3.36],  $f^2 = 0.00$ ,  $P_{\text{permutation}} = 0.445$ ;  
19 **Figure 3—figure supplement 4**). Interestingly, comparing the dorsal and ventral auditory streams,  
20 we observed a significant difference in the hierarchical-gradient effect of delusion severity  
21 (hierarchical-level-by-processing-stream interaction:  $t_{28} = 1.89$  [1.39 – 3.49],  $f^2 = 0.15$ ,  $P_{\text{permutation}} =$   
22  $0.003$ ; **Figure 3—figure supplement 4**). These results thus support the involvement of dorsolateral  
23 PFC in delusions, consistent with prior work (Corlett et al., 2007).

24 As an additional control for the uncertainty in defining the auditory hierarchy, we also adopted  
25 an anatomically agnostic, data-driven approach. First, the symptom effects ( $M1_{\text{primary}}$ ) were  
26 estimated for each voxel within the 9 auditory-system parcels (600 voxels total). Second, each  
27 voxel was ranked based on its INT value from the average INT map in the HCP dataset. Third, 10  
28 equally spaced bins along the INT ranking (60 voxels per bin) were created, which comprised the  
29 levels of the data-driven hierarchy, and the voxelwise  $t$ -statistics (from  $M1_{\text{primary}}$ ) were averaged per  
30 bin. Similar to the main analysis (**Figure 3**), a model that included main effects and interactions of  
31 symptoms on the hierarchical INT gradient was significant (omnibus  $F_{4,15} = 10.20$ ,  $P = 0.001$ ).  
32 Within this model, we found hierarchical-gradient effects that differed significantly between  
33 hallucinations and delusions (symptom-by-hierarchical-level interaction:  $t_{16} = 5.19$  [0.48 23.26],  $f^2$   
34  $= 10.12$ ,  $P_{\text{permutation}} = 0.003$ ; **Figure 3—figure supplement 5**). This interaction was driven by  
35 significant hierarchical-gradient effects in opposite directions for hallucinations (hierarchical-level  
36 effect:  $t_{16} = -2.79$  [-16.72, 2.40],  $f^2 = 0.25$ ,  $P_{\text{permutation}} = 0.049$ ; **Figure 3—figure supplement 5**) and  
37 delusions (hierarchical-level effect:  $t_{16} = 4.55$ , [1.04, 19.76],  $f^2 = 4.04$ ,  $P_{\text{permutation}} = 0.008$ ; **Figure**



1 **3—figure supplement 5).**

## 2 **Discussion**

3 Using a recently developed method for measuring neural timescales from resting-state fMRI data,  
4 we set out to test the hypothesis that hallucinations and delusions are associated with  
5 dysfunctions at different levels of neural hierarchies. Using established structural indices of  
6 hierarchy (myelin and cortical thickness) and INT (a functional index of hierarchy) in independent  
7 samples, we first validated extended sensory hierarchies for the auditory, visual, and  
8 somatosensory systems that captured substantial variability in the hierarchical MRI indices. After  
9 further showing excellent reliability of the INT measure, in exploratory analyses, we showed for  
10 the first time that patients with schizophrenia have globally reduced INT. Most importantly, our  
11 primary analyses comparing INT effects for hallucinations versus delusions in the validated  
12 hierarchies demonstrated that these symptoms are associated with distinct changes along the  
13 hierarchical gradients in the auditory and somatosensory systems, an effect we failed to observe  
14 in the visual system.

15 Hierarchical models of perceptual inference posit that perceptions are shaped by prior  
16 beliefs (Dayan et al., 1995; Friston and Kiebel, 2009; Kiebel et al., 2009; Lee and Mumford, 2003;  
17 Rao and Ballard, 1999) through reciprocal message-passing across different levels of sensory  
18 hierarchies, an architecture that mirrors the known anatomy of sensory systems (Felleman and  
19 Van, 1991; Glasser et al., 2016; Kaas and Hackett, 2000; Markov et al., 2012; Van Essen et al.,  
20 1992; Young, 1993). In this scheme, higher levels of the neural hierarchy are thought to represent  
21 increasingly abstract belief states that evolve at slower timescales (Kiebel et al., 2009). For  
22 instance, during speech perception, the hierarchical structure of linguistic units can be parsed  
23 such that lower levels of auditory processing encode syllable information at faster timescales  
24 while higher levels encode sentence information at slower timescales (Ding et al., 2016). An  
25 emerging body of work in psychosis has linked hallucinations to preferential biases towards prior  
26 beliefs in low-level inferences during detection or estimation of stimulus features (Cassidy et al.,  
27 2018; Davies et al., 2017; Powers et al., 2017; Teufel et al., 2015) and delusions to preferential  
28 biases towards prior beliefs in higher-level inferences about more abstract, hidden-states (Baker  
29 et al., 2019). The observed biases towards prior beliefs in past behavioral work can be framed as  
30 primacy biases (Baker et al., 2019), where past information is weighted more heavily during the  
31 inferential process, or equivalently, where information is integrated over longer timescales (Glaze  
32 et al., 2015). Temporal integration is at the core of the neural implementation of perceptual  
33 inference (Mazurek et al., 2003) and is thought to depend crucially on recurrent network activity  
34 (Chaudhuri et al., 2015; Mante et al., 2013). Thus, a plausible neuronal implementation of  
35 primacy biases at a given level of the hierarchy would be through increases in the strength of  
36 recurrent excitation or decreases in the strength of recurrent inhibition (i.e., elevated E/I ratio)  
37 leading to relative increases in neural timescales.

1           Here, we observed changes in neural timescales across levels of neural hierarchies that  
2 differed between hallucinations and delusions, an effect that was most evident in the auditory  
3 hierarchy. Patients with more severe hallucinations exhibited a less pronounced INT hierarchical  
4 gradient, consistent with increased timescales at lower levels compared to those with less severe  
5 hallucinations; those with more severe delusions instead exhibited a more pronounced INT  
6 hierarchical gradient, consistent with increased timescales at higher levels compared to those  
7 with less severe delusions (**Figure 3C**). We further recapitulated these findings by respectively  
8 elevating E/I ratios at low or high hierarchical levels of a large-scale biophysical model  
9 (Chaudhuri et al., 2015). These E/I ratio elevations could, in principle, result from alterations in  
10 NMDA or dopamine activation at these levels and are thus plausible under widely supported  
11 glutamatergic and dopaminergic theories of psychosis (Brunel and Wang, 2001; Corlett et al.,  
12 2009; Corlett et al., 2011; Durstewitz and Seamans, 2002; Jardri et al., 2016; Javitt et al., 2012;  
13 Weinstein et al., 2017). These results thus demonstrate distinct hierarchical alterations for  
14 hallucinations and delusions that are generally consistent with our hypothesized hierarchical  
15 framework, where distinct hierarchical alterations provide symptom-specific pathways that  
16 together may explain symptom co-occurrence, thus providing a candidate biological mechanism  
17 for the psychotic syndrome.

18           Such hierarchical alterations may also fit well with the phenomenological timescale of these  
19 symptoms. Clinical observation indicates that hallucinations—like rapidly changing sensory  
20 events—change transiently and intermittently over seconds or minutes, while delusions—like  
21 slowly changing ‘conceptual’ beliefs—evolve more slowly over days or months, but their average  
22 severity over a given period typically evolves in parallel. All of these clinical features are  
23 consistent with a hierarchical structure of nested timescales (Kiebel et al., 2008). While our  
24 findings generally support this notion, computational work explicitly laying out the proposed model  
25 in the context of inferential alterations in psychosis and empirical confirmations are warranted.  
26 One outstanding question is how the delusion-related alterations in neural timescales we  
27 observed—which may predominate in high levels of the hierarchy yet manifest as changes on the  
28 order of seconds—might drive delusions evolving over much longer timescales. One possible  
29 explanation is that, while delusion maintenance may involve longer-term memory processes, the  
30 underlying mechanism initiating delusions transpires more rapidly and disrupts inferences at  
31 timescales on the order of seconds, consistent with prior work (Baker et al., 2019). Since  
32 encoded memories likely reflect inferences summarizing information at a given time point  
33 (Shadlen and Shohamy, 2016), high-level inferential biases at shorter timescales may be  
34 sufficient to shape long-term conceptual memories in a way that further propagates biases over  
35 long time-periods, particularly under primacy biases that decrease the relative influence of newer  
36 information. Although less critical, it is also worth noting that INT reflects differences in resting  
37 circuit dynamics, the timescale of which is likely to be substantially magnified when these circuits

1 are engaged (Chaudhuri et al., 2015; Hasson et al., 2008).

2 Our opposing findings for diagnosis (globally reduced INT) and symptom severity (focally  
3 increased INT) may be reconciled within pathophysiological models of psychosis which posit a  
4 key role for compensatory processes in schizophrenia. Hallucinations and delusions have been  
5 proposed to represent a temporary state of the illness that results from a failed attempt to  
6 compensate for a trait-like, baseline deficit (Adams et al., 2013; Moutoussis et al., 2011).  
7 Relatedly, long-standing circuit-level theories have suggested that psychosis-related increases in  
8 striatal dopamine transmission are secondary to a primary cortical deficit (Weinberger, 1987). In  
9 particular, previous frameworks suggest that psychotic states are associated with excessive prior  
10 biases in inferential processes arising as an overcompensation for a baseline trait consisting of  
11 the opposite bias (Adams et al., 2013; Horga and Abi-Dargham, 2019). From a biophysical-  
12 modeling standpoint, the trait-like baseline deficit in schizophrenia could consist of globally  
13 reduced E/I ratio (for instance, arising from NMDA-receptor hypofunction of excitatory neurons  
14 (Cavanagh et al., 2019)), which behaviorally would translate into general recency biases. In  
15 contrast, a failed compensatory mechanism could result in local increases in E/I ratio at different  
16 levels leading to distinct primacy biases and psychotic symptoms (Lam et al., 2017). While  
17 speculative, the compensatory changes could arise from dopaminergic alterations that effectively  
18 increase E/I ratio by preferentially boosting NMDA-receptor function of excitatory neurons (or  
19 other changes dampening NMDA-receptor function of inhibitory neurons) (Brunel and Wang,  
20 2001).

21 Our finding of preferential involvement of the auditory system for hallucinations is not  
22 surprising, given that in schizophrenia this symptom tends to predominate in the auditory modality  
23 despite also presenting in other modalities (Lim et al., 2016; Waters and Fernyhough, 2017);  
24 auditory-cortex abnormalities in schizophrenia are also well established (Javitt and Sweet, 2015).  
25 Our finding of somatosensory system involvement for delusions is also consistent with previous  
26 work on delusions of passivity (Brüne et al., 2008; Spence et al., 1997) and deficits in sensory  
27 attenuation via motor predictions in schizophrenia (Shergill et al., 2005; Shergill et al., 2014).  
28 However, despite our failure to detect differential alterations in the visual system, substantial  
29 evidence also suggests visual-cortex abnormalities in schizophrenia (Butler et al., 2008; Çavuş et  
30 al., 2012; Dorph-Petersen et al., 2007). And evidence from subclinical populations suggests  
31 symptom-specific hierarchical alterations in visual tasks (Davies et al., 2017). Furthermore, the  
32 general differences in INT values between sensory systems (**Figure 1**), while potentially relevant  
33 to psychosis in and of themselves, could imply differential sensitivity in our analyses across  
34 sensory domains. Our null findings in the visual system are also qualified by the poorer  
35 correspondence between levels of the visual hierarchy and hierarchical MRI indices (not only for  
36 INT but also surprisingly for the structural indices) compared to the other systems (**Figure 1**).  
37 This suggests the need for further investigation into the sensitivity of available MRI measures of

1 hierarchy to uncover the underlying gradients within the visual cortex.

2 Previous empirical work using structural (Bassett et al., 2008) and functional measures  
3 (Dondé et al., 2019; Leitman et al., 2010; Yang et al., 2016), suggests hierarchical alterations in  
4 schizophrenia. This work however did not evaluate hierarchical differences between symptoms  
5 and used measures that differ fundamentally from INT. In exploratory analyses testing diagnostic  
6 effects, we found global INT reductions in schizophrenia but no clear shifts in the hierarchical INT  
7 gradients (see **Figure 2—figure supplement 2** for initial evidence of an exponential effect). We  
8 used the same approach as a previous study measuring INT in individuals with autism, which  
9 reported decreased INT in the visual cortex (and increased INT in the caudate) (Watanabe et al.,  
10 2019). Consistent with our interpretation, this INT phenotype was linked to other data in autism  
11 supporting excessive weighting of sensory evidence (Gollo, 2019; Lawson et al., 2017)—akin to a  
12 decreased primacy bias (i.e., a recency bias).

13 Some limitations are worth discussing. Because 93% of the patients (with available  
14 medication data) were taking antipsychotics, we cannot definitively rule out medication  
15 confounds, particularly on diagnosis effects. However, we observed similar effects when  
16 controlling for dose, no correlations between dose and symptoms, and did not expect differential  
17 neural effects on hallucinations versus delusions (**Figure 3—figure supplement 1**); future  
18 studies should elucidate medication effects on INT. Additionally, our study was limited to  
19 investigating the effects of global severity of hallucinations and delusions and could not resolve  
20 effects of symptom subtype or content, since detailed assessments were only available in a small  
21 subset of our patients. Larger studies with more detailed assessments are needed to tease out  
22 these potential effects.

23 In conclusion, we have presented evidence for distinct hierarchical alterations in neural  
24 timescales as a function of hallucination and delusion severity, lending initial neural support for  
25 hierarchical views of psychosis. Additionally, our work suggests that INT (Watanabe et al., 2019)  
26 provides a reliable and interpretable measure of neural function with the potential to elucidate  
27 hierarchical alterations and dysfunctions in circuit dynamics in schizophrenia and other  
28 neuropsychiatric disorders.

29

## 30 **Materials and Methods**

### 31 **Human Connectome Project Dataset**

32 T1w/T2w maps and resting-state fMRI data were obtained for a subset of 100 unrelated young  
33 and healthy subjects from the Human Connectome Project (HCP) WU-Minn Consortium (Van  
34 Essen et al., 2013). The first fMRI run (single-shot EPI with left-to-right phase encoding direction)  
35 from the first fMRI session was obtained for each subject during an eyes-open-on-fixation session  
36 with the following scanning parameters: repetition time (TR) = 720 ms; spatial resolution = 2×2×2  
37 mm; time points = 1200. High-resolution (0.7-mm isotropic voxels) T1w and T2w anatomical

1 images were also acquired. Details regarding subject recruitment and MRI data acquisition have  
2 been previously reported (Smith et al., 2013; Van Essen et al., 2012). Preprocessing of the HCP  
3 data was performed using the HCP minimal preprocessing pipeline (Glasser et al., 2013). The  
4 preprocessed fMRI data were then used for the estimation of INT maps in 32k Conte69 mesh  
5 surface space and MNI152\_ICBM2009a\_nlin volume space with native spatial resolution. The  
6 T1w/T2w (myelin) maps (Glasser and Van Essen, 2011) in 32k Conte69 mesh surface space  
7 were used to compare functional (INT) and structural (T1w/T2w) measures of hierarchy.

### 9 **Schizophrenia Combined Dataset**

10 T1w images and resting-state fMRI data were obtained for 331 healthy control subjects and 254  
11 patients diagnosed with either schizophrenia (N = 241) or schizoaffective disorder (N = 13) from  
12 four publicly available datasets. Three of these datasets were from the SchizConnect repository  
13 (BrainGluSchi (Bustillo et al., 2016), COBRE (Aine et al., 2017; Çetin et al., 2014), and  
14 NMorphCH (Alpert et al., 2016)) and one was from the OpenfMRI repository (UCLA (Poldrack et  
15 al., 2016)). Data that survived a quality-control check (~95%) and motion-censoring check (~64%)  
16 included 140 patients and 225 controls. The quality control check consisted of visual inspection of  
17 the spatially normalized images. The motion censoring check consisted of determining if there  
18 were sufficient degrees of freedom after motion censoring to perform nuisance variable  
19 regression. A subset of 158 controls was then selected that matched patients on gender and age.  
20 To minimize scanner- and site-related differences we excluded subjects if the signal-to-noise ratio  
21 (SNR) was less than 100 for any of the standard regions-of-interest (Power et al., 2011). The final  
22 sample after quality-control checks consisted of 127 patients and 152 age- and gender-matched  
23 controls (**Table 1**).

24 The fMRI data were collected for each subject during an eyes-open-on-fixation session with  
25 the following scanning parameters: TR = 2000 ms (except for NMorphCH, where TR = 2200 ms);  
26 time points (BrainGluSchi/COBRE/NMorphCH/UCLA) = 160/145/318/147; spatial resolution (mm)  
27 = 3.5×3.5×3.5/3.5×3.5×3.5/4×4×4/3×3×3. Data were preprocessed using the AFNI afni\_proc.py  
28 function (Cox, 1996). The following steps were performed: (1) removal of the first five volumes  
29 with the 3dTcat function; (2) slice-timing correction; (3) motion correction; (4) 12-parameter affine  
30 registration of the fMRI images to the T1w image; (5) spatial normalization of fMRI images to  
31 MNI152\_ICBM2009a\_nlin volume space using nonlinear warping via the T1w image; (6) single-  
32 interpolation resampling of fMRI images combining motion correction and spatial normalization.

33 Before estimating the voxelwise INT values, preprocessed fMRI data were further processed  
34 with the following steps: (1) regression of white-matter signal, cerebrospinal-fluid signal, global-  
35 brain signal, and the 6 motion parameters along with their first derivatives; (2) bandpass filtering  
36 in the 0.01–0.1 Hz range; (3) motion censoring to remove volumes with framewise displacement  
37 (FD)(Power et al., 2012) greater than 0.3 mm along with the volumes directly preceding and

1 following that volume; (4) spatial smoothing with a 4 mm full-width-at-half-maximum Gaussian  
2 kernel. After INT estimation, the INT maps for subjects from the BrainGluSchi, COBRE, and  
3 NMorphCH samples were resampled to a spatial resolution of 3×3×3 mm to match the UCLA  
4 sample.

5 Symptom severity in patients was assessed with the Positive and Negative Syndrome Scale  
6 (PANSS) (Kay et al., 1987) in the COBRE and BrainGluSchi samples, and with the Scale for the  
7 Assessment of Positive Symptoms (SAPS) (Andreasen, 1984) and the Scale for the Assessment  
8 of Negative Symptoms (SANS) (Andreasen, 1983) in the UCLA and NMorphCH samples. To  
9 appropriately combine the scores across all four samples, we chose the subset of 7 items that  
10 constituted unequivocal matches between the PANSS and SAPS/SANS (in parentheses):  
11 delusions (global rating of delusions), conceptual disorganization (global rating of positive formal  
12 thought disorder), hallucinatory behavior (global rating of hallucinations), blunted affect (global  
13 rating of affective flattening), emotional withdrawal (global rating of anhedonia/asociality),  
14 passive/apathetic social withdrawal (global rating of avolition/apathy), lack of spontaneity and flow  
15 of conversation (global rating of alogia). PANSS scores were decreased by 1 point for all levels of  
16 severity and the severe and moderately severe levels were combined into a single level so that  
17 scoring conformed to the SAPS/SANS scale (from 0 to 5 with increasing severity).

18

### 19 **HCP Dataset Analysis**

20 Based on previous work showing that lower T1w/T2w map values co-localize with higher  
21 hierarchical levels (Burt et al., 2018), as do longer neural timescales (Chaudhuri et al., 2015;  
22 Murray et al., 2014), we examined the spatial relationship between T1w/T2w, cortical thickness,  
23 and INT values. We restricted this examination to the HCP dataset since its high-resolution and  
24 good-quality structural MRI data allows for precise estimation of myelin maps. Group-averaged  
25 T1w/T2w, cortical thickness, and INT maps in surface space were parcellated using the HCP-  
26 multimodal parcellation (HCP-MMP1.0) (Glasser et al., 2016). The parcels were separated into  
27 either 6 parcel groups [the 22 sections described by Glasser et al. are divided into 6 parcel  
28 groups: (1) visual (sections 1 – 5); (2) sensorimotor (sections 6 – 9); (3) auditory (sections 10 –  
29 12); (4) remaining temporal cortex (sections 13 – 14); (5) remaining posterior cortex (sections 15  
30 – 18); (6) remaining anterior cortex (sections 19 – 22) (Glasser et al., 2016)] or 12 networks (Ji et  
31 al., 2019). We tested the parcel-wise spatial relationship between T1w/T2w or cortical thickness  
32 and INT values using linear regression.

33 Findings from the parcel-wise analysis did not support a brain-wide, system- or network-  
34 independent alignment of structural and functional hierarchies. This motivated a search for  
35 anatomically informed hierarchies within the sensory systems (auditory, visual, and  
36 somatosensory). Linear mixed-effects models were used to determine the best-fitting hierarchical  
37 ordering for each system. Models predicted hierarchical level from fixed- and random-effects (per

1 subject) of T1w/T2w and cortical thickness values for parcels ordered accordingly. Hierarchical  
2 orderings were first determined for the sensory cortices. The four most likely orderings for each  
3 sensory system were determined based on the primate anatomy literature (Felleman and Van,  
4 1991; Galaburda and Pandya, 1983; Hyvärinen and Poranen, 1978; Kaas and Hackett, 2000;  
5 Morel et al., 1993). The auditory cortex regions were A1, lateral belt (LBelt), medial belt (MBelt),  
6 parabelt (PBelt), retroinsular cortex (RI), A4, and A5. The positions of LBelt and MBelt were  
7 allowed to take either level 2 or 3 of the hierarchy; PBelt and RI were allowed to take either level  
8 4 or 5; A1 was level 1, A4 was level 6, and A5 was level 7 in all cases. The visual regions were  
9 V1, V2, V3, V4, MT, V6, and V7. The positions of V4 and MT were allowed to take either level 4  
10 or 5 of the hierarchy; V6 and V7 were allowed to take either level 6 or 7; V1 was level 1, V2 was  
11 level 2, and V3 was level 3 in all cases. The somatosensory cortex regions were areas 3b, 3a, 1,  
12 2, 5m, 7b, and 7a. Areas 3b and 3a were allowed to take either level 1 or 2 of the hierarchy;  
13 areas 1 and 2 were allowed to take either level 3 or 4; area 5m was level 5, area 7b was level 6,  
14 and area 7a was level 7 in all cases. Since all compared models had the same number of  
15 variables, the winning models for each system were simply determined based on the orderings  
16 that explained the most variance ( $R^2$ ). After selection of the hierarchies in the sensory cortices, 2  
17 downstream prefrontal cortex regions (areas 8a and 46) were added as either level 8 or 9 of the  
18 hierarchy based on a second model comparison. The PFC-extended winning hierarchies were  
19 then validated by determining the relationship of hierarchical levels with INT values using non-  
20 parametric Spearman correlations ( $r_s$ ) both in the HCP (in-sample) dataset and in the control  
21 group from the schizophrenia combined (out-of-sample) dataset. Following prior work (Burt et al.,  
22 2018), the winning hierarchies were additionally validated against human postmortem gene-  
23 expression data from the Allen Human Brain Atlas (Hawrylycz et al., 2012).

24

## 25 **HCP Robustness Analyses**

26 Because the schizophrenia combined dataset was analyzed in volume space, HCP dataset  
27 group-averaged INT maps in volume space were created and parcellated into 180 cortical parcels  
28 using HCP-MMP1.0 in volume space (<https://identifiers.org/neurovault.collection:1549>) and 8  
29 FreeSurfer (Fischl, 2012) subcortical parcels relevant to schizophrenia (thalamus, caudate,  
30 putamen, pallidum, hippocampus, amygdala, nucleus accumbens, and ventral diencephalon).  
31 The reliability of INT maps was assessed at the voxel level in volume space using the two-way  
32 random, single score intraclass correlation coefficient [ICC(2,1)] (Shrout and Fleiss, 1979). INT  
33 maps for each of the 100 subjects estimated using the first 5 minutes of data acquisition (similar  
34 to the amount of data available for the schizophrenia datasets) were compared to those  
35 estimated using the last 5 minutes of data acquisition of a single 14-minute run. To evaluate  
36 potential confounds of the INT values, we examined their relationship with age, gender, and head

1 motion—based on mean framewise displacement (Power et al., 2012) (FD)—using linear  
2 regression.

3

#### 4 **Schizophrenia Combined Dataset Analysis**

5 INT maps were parcellated into 180 cortical parcels using HCP-MMP1.0 in volumetric space  
6 (<https://identifiers.org/neurovault.collection:1549>) and 8 FreeSurfer (Fischl, 2012) subcortical  
7 parcels (thalamus, caudate, putamen, pallidum, hippocampus, amygdala, nucleus accumbens,  
8 and ventral diencephalon). In an exploratory analysis, differences in INT map values between  
9 patients with schizophrenia and healthy controls were investigated using a linear-regression  
10 model ( $M1_{\text{exploratory}}$ ) predicting INT values as a function of diagnosis while controlling for age,  
11 gender, mean FD, and sample-acquisition site (BrainGluSchi, COBRE, NMorphCH, and UCLA).  
12 To test our hypothesis of hallucination- and delusion-specific alterations of INT, we evaluated the  
13 relationships between symptom severity and INT values using a linear-regression model  
14 ( $M1_{\text{primary}}$ ) predicting INT with each of the 7 symptoms (hallucinations, delusions, conceptual  
15 disorganization, emotional withdrawal, social withdrawal, blunted affect, and alogia) as regressors  
16 while controlling for age, gender, mean FD, and sample-acquisition site. We did not use  
17 voxelwise statistical parametric-mapping approaches because our main focus was on effects  
18 along hierarchical gradients not necessarily dependent on anatomical proximity.

19

#### 20 **Permutation Testing**

21 To assess statistical significance while controlling for multiple comparisons, we used permutation  
22 tests, which provide adequate protection against false positives in fMRI analyses (Eklund et al.,  
23 2016). Our main test focused on differences between hallucinations and delusions in INT gradient  
24 effects within anatomically informed hierarchies of the auditory, visual, and somatosensory  
25 systems—reflecting symptom-specific INT alterations at different hierarchical levels. We  
26 specifically tested our primary hypothesis using a linear-regression model ( $M2$ ) featuring  
27 interactions of symptom-by-hierarchical-level within anatomical gradients in sensory systems. We  
28 included a symptom-by-hierarchical-level-by-sensory-system interaction to allow for differences  
29 between sensory systems. A post-hoc power analysis for  $M2$  showed our analyses had between  
30 88% and 99% power to detect effect sizes (Cohen's  $f^2$ ) between 0.19 and 0.36 ( $\alpha = 0.05$ ).  
31 Permutation tests compared observed effects (parcel-wise  $t$ -statistics of individual regression  
32 coefficients from  $M2$  [or  $M1_{\text{exploratory}}$ ]) to those in a null distribution obtained from 10,000 surrogate  
33 datasets in which the values of the predictor variables of interest in  $M1_{\text{primary}}$  (or  $M1_{\text{exploratory}}$ ) were  
34 randomly shuffled. Corrected  $P$ -values at 0.05 ( $P_{\text{permutation}}$ ), two-sided, are reported. Permutation  
35 tests were also used to determine null distributions of the hierarchy model-comparison for  
36 determining the hierarchical orderings. There, null distributions were obtained from 10,000  
37 surrogate datasets in which the assigned hierarchical level of each region was randomly



1 assigned. Corrected  $P$ -values at 0.05, one-sided, are reported for the model-comparison step  
 2 while corrected  $P$ -values at 0.05, two-sided, are reported for the in-sample INT correlation.

3

#### 4 **Bootstrap Confidence Intervals**

5 Bootstrap confidence intervals were determined for the results from M2 using the accelerated  
 6 bias-corrected (BC<sub>a</sub>) percentile method (Efron, 1987). 10,000 bootstraps were performed at the  
 7 level of M1<sub>primary</sub> and two-sided 95% confidence intervals were determined.

8

#### 9 **Large-Scale Biophysical Model of Cortical Neural Timescales**

10 We implemented the model of Chaudhuri et al. (Chaudhuri et al., 2015), a large-scale biophysical  
 11 model of hierarchical dynamic processing in the primate cortex. We chose this model because it  
 12 was constructed using gold-standard tract-tracing experiments to determine the directed- and  
 13 weighted-connectivity strengths between nodes (unlike similar models of the human cortex).  
 14 Additionally, this model captures the observed hierarchy of intrinsic neural timescales. The model  
 15 contains 29 nodes, each consisting of an excitatory and inhibitory population. The populations are  
 16 described by:

$$\begin{aligned}\tau_E \frac{d}{dt} v_E &= -v_E + \beta_E [I_E]_+ \\ \tau_I \frac{d}{dt} v_I &= -v_I + \beta_I [I_I]_+\end{aligned}\tag{1}$$

17  $v_E$  is the firing rate of the excitatory population, with intrinsic time constant  $\tau_E$  and input current  $I_E$ ,  
 18 and for which the f-I curve has the slope  $\beta_E$ .  $[I_E]_+ = \max(I_E, 0)$ . The inhibitory population has  
 19 corresponding parameters  $v_I$ ,  $\tau_I$ ,  $I_I$  and  $\beta_I$ . Values for  $\tau_E$ ,  $\tau_I$ ,  $\beta_E$ , and  $\beta_I$  are given below and taken  
 20 from prior work (Binzegger et al., 2009).

21 At each node, the input currents have a component originating within the area (i.e. local  
 22 input) and another originating from other areas (i.e. long-range input):

$$\begin{aligned}I_E^i &= (1 + \eta h_i)(w_{EE} v_E^i + I_{lr,E}^i) - w_{EI} v_I^i + I_{ext,E}^i \\ I_I^i &= (1 + \eta h_i)(w_{IE} v_E^i + I_{lr,I}^i) - w_{II} v_I^i + I_{ext,I}^i\end{aligned}\tag{2}$$

23 The super- and sub-script,  $i$ , denotes the node (1 – 29),  $w_{EE}$  and  $w_{EI}$  are couplings to the  
 24 excitatory population from the local excitatory and inhibitory population respectively,  $I_{lr,E}^i$  is the  
 25 long-range input to the excitatory population, and  $I_{ext,E}^i$  is external input (both stimulus input and  
 26 any noise added to the system).  $w_{IE}$ ,  $w_{II}$ , and  $I_{lr,I}^i$  are the corresponding parameters for the  
 27 inhibitory population.

28 The excitatory inputs to an area, both local and long-range, are scaled by its position in the  
 29 hierarchy,  $h_i$  (see below for details).  $h_i$  is normalized between 0 and 1, and  $\eta$  is a scaling  
 30 parameter that controls the effect of hierarchy. By setting  $\eta = 0$ , the intrinsic differences between

1 areas are removed. Note that both local and long-range projections were scaled by hierarchy,  
 2 rather than just local projections, following prior observations (Markov et al., 2010).

3 Long-range input is modeled as excitatory current to both excitatory and inhibitory cells:

$$I_{lr,E}^i = \mu_{EE} \sum_{j=1}^{29} FLN_{ij} v_E^j$$

$$I_{lr,I}^i = \mu_{IE} \sum_{j=1}^{29} FLN_{ij} v_E^j$$
(3)

4 Here,  $j$  ranges over all areas.  $I_{lr,E}^i$  and  $I_{lr,I}^i$  are the inputs to the excitatory and inhibitory  
 5 populations,  $v_E^j$  is the firing rate of the excitatory population in area  $j$  and  $FLN_{ij}$  is the fraction of  
 6 labeled neurons (FLN; see below for details) from area  $j$  to area  $i$ .  $\mu_{EE}$  and  $\mu_{IE}$  are scaling  
 7 parameters that control the strengths of long-range input to the excitatory and inhibitory  
 8 populations, respectively, and do not vary between connections; all the specificity comes from the  
 9 FLN. Long-range connectivity is thus determined by three parameters:  $\mu_{EE}$  and  $\mu_{IE}$  control the  
 10 connection strengths of long-range projections, and  $\eta$  maps the hierarchy into excitatory  
 11 connection strengths. The excitatory-to-inhibitory ratio of input current,  $\gamma = I_{inp,E}/I_{inp,I}$ , was  
 12 chosen such that the steady-state firing rate of the excitatory population does not change when  
 13 the current is present. Given an input of  $I_{inp,E}$  to the excitatory population, an input of  $\gamma I_{inp,E}$  to the  
 14 inhibitory population increases the inhibitory firing rate sufficiently to cancel out the additional  
 15 input to the excitatory population.  $\mu_{EE}$  and  $\mu_{IE}$  were chosen with a ratio slightly above this value  
 16 so that projections are weakly excitatory.

17 Parameter values were:  $\tau_E = 20$  ms,  $\tau_I = 10$  ms,  $\beta_E = 0.066$  Hz/pA,  $\beta_I = 0.351$  Hz/pA,  $w_{EE} =$   
 18  $24.3$  pA/Hz,  $w_{IE} = 12.2$  pA/Hz,  $w_{EI} = 19.7$  pA/Hz,  $w_{II} = 12.5$  pA/Hz,  $\mu_{EE} = 33.7$  pA/Hz,  $\mu_{IE} = 25.3$   
 19 pA/Hz and  $\eta = 0.68$ . Background input for each area was chosen so that the excitatory and  
 20 inhibitory populations had rates of 10 and 35 Hz, respectively. As in Chaudhuri et al., we added  
 21 an external input of white-noise to all areas with a mean of 0 Hz and a standard deviation of  $10^{-5}$   
 22 Hz.

23 Connectivity data are from an ongoing project that is quantitatively measuring all  
 24 connections between cortical areas in the macaque cortex (Markov et al., 2013; Markov et al.,  
 25 2012). The connection strengths between areas are measured by counting the number of  
 26 neurons labeled by retrograde tracer injections. To control for injection size, these counts are  
 27 normalized by the total number of neurons labeled in the injection, giving a fraction of labeled  
 28 neurons (FLN):

$$FLN_{j \rightarrow i} = \frac{\text{number of neurons projecting to area } i \text{ from area } j}{\text{total number of neurons projecting to area } i \text{ from all areas}}$$
(4)

29 These data were also used to estimate the fraction of neurons in a projection originating in the  
 30 supragranular layers (SLN):

$$SLN_{j \rightarrow i} = \frac{\text{number of supragranular neurons projecting to area } i \text{ from area } j}{\text{number of neurons projecting to area } i \text{ from area } j} \quad (5)$$

1 The hierarchy was constructed following a similar framework to Markov et al. (Markov et al.,  
2 2014), using a generalized linear model. Hierarchical values were assigned to each area such  
3 that the difference in values predicts SLN (Barone et al., 2000):

$$SLN_{j \rightarrow i} \approx g^{-1}(h_i - h_j) \quad (6)$$

4 where  $g^{-1}$  is a logistic function (logistic regression) and  $h_i$  is the hierarchy value of area  $i$ . In the  
5 fit, the contribution of each projection is weighted by the log of its FLN to preferentially match  
6 stronger and less noisy projections (Chaudhuri et al., 2015). All connectivity data can be  
7 downloaded from [www.core-nets.org](http://www.core-nets.org).

8 The simulated neuronal activity was converted to blood-oxygen-level-dependent (BOLD)  
9 fMRI signal using the Balloon-Windkessel hemodynamic model (Stephan et al., 2007), a  
10 dynamical model that describes the transduction of neuronal activity ( $v_E$ ) to changes in a  
11 vasodilatory signal ( $s$ ) that is subject to autoregulatory feedback. This vasodilatory signal is  
12 coupled to changes in cerebral blood flow ( $f$ ) that result in changes to the normalized total  
13 deoxyhemoglobin content ( $q$ ) and normalized venous blood volume ( $v$ ). For each area ( $i$ ), these  
14 biophysical variables are defined by the following equations:

$$\frac{ds_i}{dt} = v_E^i - \kappa s_i - \gamma(f - 1) \quad (7)$$

$$\frac{df_i}{dt} = s_i \quad (8)$$

$$\tau_{MTT} \frac{dv_i}{dt} = f_i - v_i^{1/\alpha} \quad (9)$$

$$\tau_{MTT} \frac{dq_i}{dt} = f_i \frac{1 - (1 - \rho)^{1/f_i}}{\rho} - v_i^{1/\alpha} \frac{q_i}{v_i} \quad (10)$$

15 where  $\tau_{MTT}$  is the mean transit time of blood,  $\rho$  is the resting oxygen extraction fraction, and  $\alpha$   
16 represents the resistance of the veins (i.e., stiffness). For each area ( $i$ ), the BOLD signal ( $B$ ), is a  
17 static nonlinear function of deoxyhemoglobin content ( $q$ ) and venous blood volume ( $v$ ), that  
18 comprises a volume-weighted sum of extravascular and intravascular signals:

$$B_i = V_0 \left[ k_1(1 - q_i) + k_2 \left( 1 - \frac{q_i}{v_i} \right) + k_3(1 - v_i) \right]$$

$$k_1 = 4.3\vartheta_0\rho TE$$

$$k_2 = \varepsilon r_0\rho TE$$

$$k_3 = 1 - \varepsilon \quad (11)$$

19 where  $V_0$  is the resting venous blood volume fraction,  $\vartheta_0$  is the frequency offset at the outer  
20 surface of the magnetized vessel for fully deoxygenated blood,  $\varepsilon$  is the ratio of intra- and extra-  
21 vascular signals,  $r_0$  is the slope of the relation between the intravascular relaxation rate  $R_{2l}^*$  and  
22 oxygen saturation, and  $TE$  is the echo time of the fMRI acquisition. Parameters for the Balloon-

1 Windkessel model matched those used previously for a 3T fMRI experiment (Stephan et al.,  
2 2007). Simulated BOLD signals were downsampled to a temporal resolution of 2 seconds (i.e.,  
3 TR = 2 seconds) to match the *in vivo* data and INTs were estimated as for the *in vivo* data.

4 To simulate the observed effects of hallucination and delusion severity on INT, we perturbed  
5 the strength of the couplings to the excitatory population from the local excitatory population ( $w_{EE}$ )  
6 or to the inhibitory population from the local excitatory population ( $w_{IE}$ ) for specific nodes. Note  
7 that the original definition of the model assigned the same values of  $w_{EE}$  and  $w_{IE}$  to all nodes, but  
8 here we manipulated these values differentially across nodes. We investigated alterations in  
9 excitation-inhibition (E/I) ratios by allowing the strength of recurrent connections to vary in 5 of the  
10 6 nodes that correspond to levels of our hierarchy (V1, V2, V4, MT, 8l, and 46d, with the latter  
11 being fixed) to recapitulate our *in vivo* observations. Recurrent connection strength was fixed for  
12 46d to avoid model instability upon small parameter changes (E/I ratio changes of ~1%) due to  
13 the strong connectivity at this level. The E/I ratio changes were modeled as a triangle function  
14 where a local maximum exhibited a peak E/I ratio increase and other nodes had E/I ratio changes  
15 that decreased linearly as a function of absolute distance in hierarchical levels from the peak.  
16 This function was described by 3 free parameters. (i) The hierarchical level of the peak E/I ratio  
17 increase, which was allowed to take any integer between 1 and 8. Given their stationary nature,  
18 these parameters were held constant such that fitting was performed for each combination of  
19 peak E/I ratio increase (1–8 for hallucinations and 1–8 for delusions) using a grid search. (ii) The  
20 magnitude of the E/I ratio increase at the peak (expressed as percent change to the local  
21 recurrent connection strength), which was allowed to vary between 0% and 40%. (iii) The  
22 magnitude of the E/I ratio change at the minimum (i.e., at the hierarchical level furthest from the  
23 peak), which was allowed to vary between -30% and 40%.

24 To facilitate fitting the biophysical model, we used regression fits from M1<sub>primary</sub> in the  
25 auditory system to estimate INT values at each level of the hierarchy for 4 “exemplary cases”: (1)  
26 no hallucinations or delusions (fitted INT values from M1<sub>primary</sub> with minimum scores of 0 for both  
27 symptoms); (2) hallucinations only (maximum score of 5 for hallucinations and score of 0 for  
28 delusions); (3) delusions only (scores of 0 for hallucinations and 5 for delusions); (4)  
29 hallucinations and delusions (scores of 5 for both symptoms). For all exemplary cases, the  
30 severity of other symptoms and the values of covariates were set to the average values from all  
31 patients. Changes of INT for exemplary cases 2–4 were determined as the difference in INT  
32 relative to the ‘no hallucinations or delusions’ case (*in vivo*  $\Delta$ INT). Model-derived *in silico*  $\Delta$ INT  
33 were calculated for each node as the difference in INT from the unaltered biophysical model (i.e.,  
34  $w_{IE} = 12.2$  pA/Hz for all nodes). The parameters describing the E/I ratio changes were fit by  
35 minimizing the sum of squared errors between the *in silico*  $\Delta$ INT (nodes: V1 [level 1], V2 [level 2],  
36 V4 [level 4], MT [level 5], 8l [level 8], and 46d [level 9]) and the *in vivo*  $\Delta$ INT (parcels: A1 [level 1],  
37 LBelt [level 2], PBelt [level 4], RI [level 5], 8a [level 8], and 46 [level 9]). We simultaneously fit the

1 3 free parameters for each symptom (3 parameters for hallucinations and 3 parameters for  
2 delusions) using *in vivo*  $\Delta$ INT for exemplary cases 2–4 (18 data points) with the combined effect  
3 of hallucinations and delusions fit by the sum of E/I ratio changes for hallucinations and the E/I  
4 ratio changes for delusions. This was done by calculating the error between the biophysical  
5 model with E/I ratio changes for the hallucination parameters and exemplary case 2; the error  
6 between the biophysical model with E/I ratio changes for the delusion parameters and exemplary  
7 case 3; the error between the biophysical model with E/I ratio changes determined by the sum of  
8 the E/I ratio changes for the hallucination parameters and the E/I ratio changes for the delusion  
9 parameters, and exemplary case 4; and minimizing the sum of squared errors. Results are shown  
10 for reductions to  $w_{IE}$ , but similar effects were observed when increasing  $w_{EE}$  since both effectively  
11 increase the E/I ratio.

12

### 13 **Acknowledgments**

14 We would like to thank Drs. Rishidev Chaudhuri and Xiao-Jing Wang for their guidance in  
15 implementing the large-scale biophysical model. We would also like to thank Mr. Joshua Burt and  
16 Dr. John Murray for sharing their compilation of the Allen Human Brain Atlas data. This work was  
17 supported by the National Institute of Mental Health under awards R01MH117323 and  
18 R01MH114965. BrainGluSchi: data were downloaded from the COllaborative Informatics and  
19 Neuroimaging Suite Data Exchange tool (COINS; <http://coins.mrn.org/dx>) and data collection was  
20 funded by NIMH R01MH084898-01A1. COBRE: Data was downloaded from the COllaborative  
21 Informatics and Neuroimaging Suite Data Exchange tool (COINS; <http://coins.mrn.org/dx>), data  
22 collection was performed at the Mind Research Network, and funded by a Center of Biomedical  
23 Research Excellence (COBRE) grant 5P20RR021938/P20GM103472 from the NIH to Dr. Vince  
24 Calhoun. NMorphCH: data were obtained from the Neuromorphometry by Computer Algorithm  
25 Chicago (NMorphCH) dataset (<http://nunda.northwestern.edu/nunda/data/projects/NMorphCH>);  
26 the investigators within NMorphCH contributed to the design and implementation of NMorphCH  
27 and/or provided data but did not participate in analysis or writing of this report; data collection and  
28 sharing for this project was funded by NIMH grant R01MH056584. UCLA: data was obtained from  
29 the OpenfMRI database (its accession number is ds000030) and data collection was funded by  
30 the Consortium for Neuropsychiatric Phenomics (NIH Roadmap for Medical Research grants  
31 UL1-DE019580, RL1MH083268, RL1MH083269, RL1DA024853, RL1MH083270,  
32 RL1LM009833, PL1MH083271, and PL1NS062410). HCP: Data were provided by the Human  
33 Connectome Project, WU-Minn Consortium (Principal Investigators: David Van Essen and Kamil  
34 Ugurbil; 1U54MH091657) funded by the 16 NIH Institutes and Centers that support the NIH  
35 Blueprint for Neuroscience Research; and by the McDonnell Center for Systems Neuroscience at  
36 Washington University.

## 1 **Figure Supplements**

2 **Figure 1—figure supplement 1. Comparison of Different Methods for INT Estimation: Sum**  
3 **of Initial Positive Period vs Exponential Fit.** Relationship between neural timescales estimated  
4 using the sum of the initial positive period (INT, x-axis) and an exponential fit ( $\tau$ , y-axis) to the  
5 autocorrelation function. Results for vertices (left) and parcels (right). Lines of best-fit are shown  
6 for comparison. The INT method of Watanabe et al. (Watanabe et al., 2019) is similar to  
7 estimating the decay rate of an exponential fit to the autocorrelation function (Murray et al., 2014).  
8 The former method was used in our study to maintain consistency with the previous study, which  
9 validated the technique against INT measured by electroencephalography (Watanabe et al.,  
10 2019). Additionally, this method avoids the need for nonlinear fitting—which is known to be  
11 challenging (Transtrum et al., 2010) and computationally expensive,—and may be more robust.  
12 The difference between timescales estimated with the two methods was assessed in the 100  
13 HCP subjects by comparing the group averaged timescale maps using Spearman correlation.  
14 The correlation between the two methods was almost perfect (vertices:  $r_s = 0.9986$ ,  $P \ll 0.01$ ;  
15 parcels:  $r_s = 0.9985$ ,  $P \ll 0.01$ ) but there is an upwards bias in values estimated using the  
16 method of Watanabe et al. (Watanabe et al., 2019).

17  
18  
19 **Figure 1—figure supplement 2. Relationships Between Intrinsic Neural Timescales and**  
20 **either T1w/T2w (Myelin) or Cortical Thickness.** As reported in the **Main Text**, we did not  
21 observe a clear parcel-wide relationship between structural markers of hierarchy and INT. These  
22 relationships were investigated using two parcel-groupings; those described by Glasser et al.  
23 (left) and the Cole-Anticevic networks described by Jing et al. (right). To better characterize the  
24 relationship between myelin (top) or cortical thickness (bottom) and INT, intercepts for each  
25 parcel group (visual, auditory, sensorimotor, posterior, anterior, and temporal) or network (primary  
26 visual, secondary visual, somatomotor, cingulo-opercular, dorsal attention, language,  
27 frontoparietal, auditory, default mode, posterior multimodal, ventral multimodal, and orbito-  
28 affective) were introduced to allow for overall differences in INT-by-parcel-group (or INT-by-  
29 network) given the apparent differences observed in the data. Parcel-group-by-T1w/T2w-value (or  
30 network-by-T1w/T2w-value) interactions and parcel-group-by-cortical-thickness (or network-by-  
31 cortical-thickness) were also introduced to allow for differences in the relationship between  
32 T1w/T2w (or cortical thickness) and INT values across parcel groups (or networks).

33 We found that an extended model with parcel-group intercepts and interactions of parcel-  
34 group-by-T1w/T2w explained significantly more variance in INT than the reduced model (no  
35 parcel-group intercepts or interactions): parcel groups differed in INT (model with parcel-group  
36 intercepts versus reduced model:  $F_{10,167} = 12.03$ ,  $P < 10^{-14}$ ) and their relationship between  
37 T1w/T2w and INT (model with parcel-group intercepts and interactions of parcel-group-by-

1 T1w/T2w versus a model with parcel-group intercepts but no interaction terms:  $F_{5,167} = 5.55$ ,  $P <$   
2  $10^{-4}$ ). Similar results were observed for the Cole-Anticevic Networks, where we found that an  
3 extended model with network intercepts and interactions of network-by-T1w/T2w explained  
4 significantly more variance in INT than the reduced model (no network intercepts or interactions):  
5 networks differed in INT (model with network intercepts versus reduced model:  $F_{22,155} = 4.62$ ,  $P <$   
6  $10^{-8}$ ) and their relationship between T1w/T2w and INT (model with network intercepts and  
7 interactions of network-by-T1w/T2w versus model with network intercepts but no interactions:  
8  $F_{11,155} = 2.15$ ,  $P = 0.020$ ).

9 For cortical thickness, we found that an extended model with parcel-group intercepts and  
10 interactions of parcel-group-by-cortical-thickness explained significantly more variance in INT  
11 than the reduced model (no parcel-group intercepts or interactions): parcel groups differed in INT  
12 (model with parcel-group intercepts versus reduced model:  $F_{10,167} = 8.59$ ,  $P < 10^{-10}$ ) and their  
13 relationship between cortical-thickness and INT (model with parcel-group intercepts and  
14 interactions of parcel-group-by-cortical-thickness versus a model with parcel-group intercepts but  
15 no interaction terms:  $F_{5,167} = 5.05$ ,  $P < 10^{-3}$ ). Similar results were observed for the Cole-Anticevic  
16 Networks, where we found that an extended model with network intercepts and interactions of  
17 network-by-cortical-thickness explained significantly more variance in INT than the reduced  
18 model (no network intercepts or interactions): networks differed in INT (model with network  
19 intercepts versus reduced model:  $F_{22,155} = 3.58$ ,  $P < 10^{-5}$ ) and their relationship between cortical-  
20 thickness and INT (model with network intercepts and interactions of network-by-cortical-  
21 thickness versus a model with network intercepts but no interactions:  $F_{11,155} = 1.96$ ,  $P = 0.036$ ).

22 These results suggest that the relationship between structural hierarchies (T1w/T2w and  
23 cortical thickness) and functional hierarchy (INT) is not constant across the whole brain but rather  
24 changes for different parcel groups and networks.

25  
26

27 **Figure 1—figure supplement 3. Selected sensory hierarchies demonstrate a hierarchical-**  
28 **gradient effect of granular layer IV (L4) gene expression.** Scatter plots showing L4 gene  
29 expression plotted as a function of hierarchical level for the winning orderings. Expression is plotted  
30 in units of standard deviation (s.d.;  $\sigma$ ) from the mean. Gene expression data are from the Allen  
31 Human Brain Atlas as compiled by Burt et al. (Nature Neuroscience, 2018).

32  
33

34 **Figure 1—figure supplement 4. Effect of framewise displacement (FD) on estimated**  
35 **intrinsic neural timescales (INT). A)** t-statistic values from a regression model predicting INT  
36 from the average FD during fMRI data acquisition plotted as a function of the INT rank for 100  
37 HCP subjects. Each datapoint represents one parcel. 181 out of 188 parcels showed significantly

1 shorter INT with greater FD ( $P_{\text{permutation}} = 0.01$ ). Although there was a significant effect of FD on  
2 INT throughout the whole brain, this effect was not modulated by order within the INT hierarchy  
3 (i.e. the correlation in **A** is not significant against the null distribution). **B**) t-statistic values from  
4 parcels within the well-defined auditory hierarchy (left) and visual hierarchy (right) plotted as a  
5 function of hierarchical level. The effect of FD on estimated INT was not modulated by position  
6 within well-defined sensory hierarchies across sensory systems (i.e. no significant difference  
7 between the correlations in **B** tested against the null distribution). To determine the effect of head  
8 motion during resting-state fMRI data acquisition on estimated INT values, we used a linear-  
9 regression model to predict INT as a function of average FD while controlling for age and gender.  
10 Because average FD represents a summary measure of head motion during the entire  
11 acquisition, this regression does not provide information regarding differential effects of sustained  
12 small-levels of head motion versus infrequent but large-levels of head motion.

13  
14  
15 **Figure 1—figure supplement 5. Reliability of Intrinsic Neural Timescale Estimation.** INT  
16 maps for 100 HCP subjects were estimated in volume space and the values at each voxel falling  
17 within the 188 volume parcels were compared when INT was estimated from the first 5 minutes or  
18 the last 5 minutes of fMRI acquisition. The INT maps showed excellent reliability based on the  
19 ICC(2,1) between the first and last 5 minutes of the fMRI acquisition (median ICC  $\pm$  interquartile  
20 range across voxels:  $0.94 \pm 0.03$ ).

21  
22  
23 **Figure 1—figure supplement 6. Model comparison to determine the hierarchical ordering of**  
24 **the ventral auditory pathway. A)** Goodness-of-fit ( $R^2$ ) of linear mixed-effects models predicting  
25 different hierarchical orderings for the ventral auditory system from T1w/T2w and cortical thickness  
26 values in the HCP dataset. First, the winning ordering (i.e., the model with the best goodness of fit)  
27 for each system was determined for the 7 sensory cortex regions (bottom 4 models); then, winning  
28 orderings were determined for extended models with 2 downstream prefrontal cortex regions added  
29 to the respective winning models for sensory cortex (top 2 models). Note that, for each of the four  
30 considered orderings within the sensory cortex for each system, only the 4 regions whose order is  
31 varied (out of 7 regions) are shown to denote the models. For the auditory cortex, A1 was always  
32 the lowest order region while A4 and A5 were always the two highest-order regions. Null  
33 distributions were generated by randomly permuting the hierarchical ordering (0<sup>th</sup> – 95<sup>th</sup> percentiles  
34 shown). **B)** Scatterplots showing INT values plotted as a function of hierarchical level for the PFC-  
35 extended winning model in **B** (red outline) for the HCP dataset (top) and the healthy control group  
36 in the schizophrenia combined dataset ( $N = 158$ ; bottom).

37



1 **Figure 2—figure supplement 1. Voxel-Wise Analysis of Intrinsic Neural Timescales in**  
2 **Schizophrenia versus Health.** Patients with schizophrenia show widespread voxelwise  
3 reductions in intrinsic neural timescales compared to healthy controls. t-statistic values from a  
4 regression model predicting INT controlling for age, gender, framewise displacement, and data  
5 collection site, plotted as a function of the INT rank. Each datapoint represents one voxel. We  
6 repeated the exploratory analysis of INT in patients with schizophrenia versus healthy controls at  
7 the level of individual voxels. Only voxels that fell within the 188 parcels were included in this  
8 analysis. Similar results were observed as reported in the **Main Text (Figure 3E)** where we  
9 investigated effects at the level of parcels. Relative to controls, patients with schizophrenia  
10 exhibited a small-to-moderate but widespread reduction of INT (overall effect of diagnosis: 5,511  
11 out of 27,884 voxels,  $P_{permutation} = 0.020$ ); A non-significant number of voxels also showed  
12 significantly longer INT in patients with schizophrenia compared to healthy controls (93 out of  
13 27,884 voxels,  $P_{permutation} = 0.49$ ).

14  
15  
16 **Figure 2—figure supplement 2. Biophysical Model Simulation of Reduced Intrinsic Neural**  
17 **Timescales in Schizophrenia versus Health.** An *in silico* simulation using a large-scale  
18 biophysical model suggested that the globally shorter INT observed in patients with schizophrenia  
19 could be neuronally implemented by globally reduced E/I ratio. A scatterplot shows the difference  
20 in intrinsic neural timescale (INT) values estimated for the reference (healthy) simulated scenario  
21 and the globally reduced excitatory-to-excitatory recurrent connection strength (reduced E/I ratio);  
22 each data point denotes 1 of the 29 nodes (top). Relative to the reference scenario, reduced  
23 excitatory-to-excitatory recurrent connection strength leads to a global reduction of INT values  
24 with the effect becoming more pronounced for regions with longer timescales in the healthy  
25 condition. The data are well described by an exponential model ( $R^2 = 0.94$ ). A scatterplot shows  
26 the t-statistic values from a regression model predicting INT group differences controlling for age,  
27 gender, framewise displacement, and data collection site, plotted as a function of the INT value in  
28 healthy subjects (determined from group-averaged INT map from HCP subjects to reduce  
29 circularity); each data point denotes the average of 6 parcels along the INT hierarchy for a similar  
30 number of data points as the biophysical model results (bottom). Similar to the biophysical model  
31 simulation, the data are better fit by an exponential model (Matlab *fitnlm*:  $F_{2,28} = 10.3$ ,  $P = 0.003$ ;  
32 BIC = 4.8), than a linear model (Matlab *fitnlm*:  $F_{1,29} = 1.4$ ,  $P = 0.25$ ; BIC = 9.3). Similar results are  
33 observed when no binning of the data is performed (exponential model:  $F_{2,185} = 8.3$ ,  $P = 0.005$ ;  
34 BIC = 366.4; linear model:  $F_{1,186} = 0.8$ ,  $P = 0.38$ ; BIC = 368.6). The findings are similar to a recent  
35 study that recapitulated the behavior of macaque monkeys on an evidence-varying decision-  
36 making task following intramuscular administration of a subanesthetic dose of ketamine by  
37 reducing the strength of the couplings to the excitatory population from the local excitatory

1 population ( $w_{EE}$ ) by 1.75% to achieve a global reduction of E/I ratio (Cavanagh et al., 2019). This  
2 is consistent with the NMDA-receptor hypofunction hypothesis of schizophrenia (Corlett et al.,  
3 2011; Kehrer et al., 2008; Krystal et al., 2003; Lisman et al., 2008; Olney and Farber, 1995), and  
4 the use of ketamine as a model of schizophrenia (Becker et al., 2003; Corlett et al., 2011;  
5 Frohlich and Van Horn, 2014; Krystal et al., 1994). Furthermore, our biophysical model results  
6 support recent evidence of how global changes can preferentially affect higher-order brain  
7 regions (Yang et al., 2016); and our in vivo results lend additional (although preliminary)  
8 evidence.

9  
10  
11 **Figure 3—figure supplement 1. Controlling for medication dose does not change the**  
12 **distinct hierarchical-gradient effects of hallucination and delusion severity in the auditory**  
13 **and somatosensory systems. A)** Scatterplots showing  $t$ -statistic values for hallucination-  
14 severity (top) or delusion-severity (bottom) effects from parcels within the auditory (left), visual  
15 (middle), or somatosensory (right) hierarchies plotted as a function of hierarchical level. **B)**  
16 Summary of results from a model including symptom-severity effect (hallucination or delusion),  
17 hierarchical level, sensory system (auditory, visual, or somatosensory), and their interactions. We  
18 repeated the main analysis comparing the effects of hallucination and delusion severity when  
19 including medication dose as a covariate. Only 109 of the 127 patients had available data for  
20 chlorpromazine equivalents. All results were similar to those reported in the **Main Text** where the  
21 effect of medication dose was not controlled for. The model explaining symptom effects and their  
22 differences by hierarchical-level and their interaction by symptoms and sensory system was  
23 significant (omnibus  $F_{11,41} = 22.4$ ,  $P < 10^{-13}$ ). Critically, we found significant hierarchical-gradient  
24 effects that differed between hallucinations and delusions (auditory system symptom-by-  
25 hierarchical-level interaction:  $t_{42} = 4.48$ ,  $P_{permutation} = 0.002$ ; visual:  $t_{42} = -0.88$ ,  $P_{permutation} = 0.560$ ;  
26 and somatosensory:  $t_{42} = 3.92$ ,  $P_{permutation} = 0.001$ ). These interactions were in the expected  
27 direction for 2/3 of the sensory systems auditory and somatosensory; negative hierarchical  
28 gradient for hallucinations and positive hierarchical gradient for delusions). In the auditory system,  
29 this effect was driven by significant hierarchical-gradient effects in opposite directions for  
30 hallucinations (hierarchical-level effect:  $t_{42} = -3.40$ ,  $P_{permutation} = 0.013$ ) and delusions (hierarchical-  
31 level effect:  $t_{42} = 2.94$ ,  $P_{permutation} = 0.028$ ). In the somatosensory system, this effect was driven by  
32 a trend-level negative hierarchical-gradient effect for hallucinations (hierarchical-level effect:  $t_{42} =$   
33  $-2.25$ ,  $P_{permutation} = 0.064$ ) and a significant negative hierarchical-gradient effect for delusions  
34 (hierarchical-level effect:  $t_{42} = 3.30$ ,  $P_{permutation} = 0.017$ ).

1 **Figure 3—figure supplement 2. Distinct hierarchical-gradient effects of hallucinations and**  
2 **delusions are robust to the choice of sensory hierarchies.** Summary of results from a model  
3 including symptom-severity effect (hallucination or delusion), hierarchical level, sensory system  
4 (auditory, visual, or somatosensory), and their interactions for each of the 4 sensory-cortex  
5 hierarchies tested for the auditory (left), visual (middle), and somatosensory (right) systems  
6 during **Selection and Multimodal Validation of Neural Hierarchies**. For the auditory system,  
7 A1 was always the lowest order region while A4 and A5 were always the 6<sup>th</sup> and 7<sup>th</sup> level regions.  
8 For the visual system, V1, V2, and V3 were always the three lowest order regions. For the  
9 somatosensory system, 5m, 7b, and 7a were always the 5<sup>th</sup>, 6<sup>th</sup>, and 7<sup>th</sup> level regions  
10 respectively. For all 3 sensory systems, areas 8A and 46 were always the two highest order  
11 regions. The winning orderings from the selection process (**Figure 1**) are outlined in red. For this  
12 analysis, one sensory system hierarchical-ordering was tested while the other two sensory  
13 system hierarchical-orderings were chosen to be the winning orderings. Null distributions were  
14 generated by randomly permuting symptom-severity scores across patients in M1<sub>primary</sub> (2.5<sup>th</sup> –  
15 97.5<sup>th</sup> percentiles shown).  
16  
17

18 **Figure 3—figure supplement 3. Only positive symptoms show hierarchical-gradient effects**  
19 **in the auditory system and only delusions show a hierarchical-gradient effect in the**  
20 **somatosensory system.** *t*-statistic values for the hierarchical-gradient effect of each symptom in  
21 the auditory and somatosensory systems. In the auditory system, all three positive symptoms  
22 (including conceptual disorganization) show significant effects while none of the negative  
23 symptoms show significant effects. In the somatosensory system, only delusions show a  
24 significant effect, although hallucinations show the strongest negative effect. These results reflect  
25 some level of selectivity that should be examined in more detail in future studies. It is important to  
26 note that the perceptual inference model of psychosis does not require these effects to be  
27 specific to hallucinations and delusions. Furthermore, an effect of conceptual disorganization—a  
28 positive symptom that unlike negative symptoms tends to correlate with hallucinations and  
29 delusions—may suggest extensions of the model to account for additional phenomena.  
30  
31

32 **Figure 3—figure supplement 4. Comparison of hierarchical-gradient effects in the dorsal**  
33 **and ventral auditory systems. A)** Scatterplots showing *t*-statistic values for hallucination-  
34 severity (top) or delusion-severity (bottom) effects from parcels within the dorsal auditory (left;  
35 areas 8a and 46) and ventral auditory (right; areas 10 and 12vl) hierarchies plotted as a function  
36 of hierarchical level. **B)** Summary of results from a model including symptom-severity effect  
37 (hallucination or delusion), hierarchical level, sensory system (dorsal or ventral auditory system),

1 and their interactions. These results demonstrate: (1) in both the dorsal and ventral auditory  
2 systems, there is a significant hierarchical-gradient effect of hallucination severity and these  
3 effects are not significantly different from another (a); (2) there is no significant difference in the  
4 relationship between hallucination severity and hierarchical level versus that for delusion severity  
5 and hierarchical level in the ventral auditory system (b); (3) there is no significant hierarchical-  
6 gradient effect of delusion severity in the ventral auditory system. These findings add to previous  
7 evidence suggesting that the dorsolateral prefrontal cortex (area 46; included in dorsal but not  
8 ventral auditory system) may play a key role in delusions.

9  
10  
11 **Figure 3—figure supplement 5. Distinct hierarchical-gradient effects of hallucination and**  
12 **delusion severity in the auditory system are observed when using an anatomically**  
13 **agnostic definition of the hierarchy.** Scatterplots showing *t*-statistic values for hallucination-  
14 severity (left) or delusion-severity (right) effects from bins consisting of the average from 60  
15 voxels within the 9 auditory system parcels (600 voxels total) as a function of hierarchical level.  
16 Voxels were first ranked using their corresponding intrinsic neural timescale (INT) value in the  
17 HCP dataset group-averaged INT map and then averaged within 10 equally spaced bins. Similar  
18 to our main analysis results, we observe a significant symptom-by-hierarchical-level interaction, a  
19 significant negative hierarchical-gradient effect for hallucinations, and a significant positive  
20 hierarchical-gradient effect for delusions.

## 21 22 23 **Source Data**

24 **Table 1-source data:** Raw data for each individual subject in **Table 1**.

25 **Figure 1-source data:** Data and code to reproduce **Figure 1**.

26 **Figure 2-source data:** Data and code to reproduce **Figure 2**.

27 **Figure 3-source data:** Data and code to reproduce **Figure 3**.

28 **Figure 4-source data:** Data and code to reproduce **Figure 4**.

## 29 30 31 **References**

32 Adams, R.A., Napier, G., Roiser, J.P., Mathys, C., Gilleen, J., 2018. Attractor-like dynamics in  
33 belief updating in schizophrenia. *Journal of neuroscience* 38, 9471-9485.

34 Adams, R.A., Stephan, K.E., Brown, H.R., Frith, C.D., Friston, K.J., 2013. The computational  
35 anatomy of psychosis. *Frontiers in psychiatry* 4, 47.

36 Aine, C., Bockholt, H.J., Bustillo, J.R., Cañive, J.M., Caprihan, A., Gasparovic, C., Hanlon, F.M.,  
37 Houck, J.M., Jung, R.E., Lauriello, J., 2017. Multimodal neuroimaging in schizophrenia:  
38 description and dissemination. *Neuroinformatics* 15, 343-364.

- 1 Alpert, K., Kogan, A., Parrish, T., Marcus, D., Wang, L., 2016. The northwestern university  
2 neuroimaging data archive (NUNDA). *NeuroImage* 124, 1131-1136.
- 3 Andreasen, N., 1983. The scale for the assessment of negative symptoms (SANS) Iowa City. IA:  
4 University of Iowa.
- 5 Andreasen, N.C., 1984. Scale for the Assessment of Positive Symptoms:(SAPS). University of  
6 Iowa.
- 7 Association, A.P., 2013. Diagnostic and statistical manual of mental disorders (DSM-5®).  
8 American Psychiatric Pub.
- 9 Baker, S.C., Konova, A.B., Daw, N.D., Horga, G., 2019. A distinct inferential mechanism for  
10 delusions in schizophrenia. *Brain* 142, 1797-1812.
- 11 Barone, P., Batardiere, A., Knoblauch, K., Kennedy, H., 2000. Laminar distribution of neurons in  
12 extrastriate areas projecting to visual areas V1 and V4 correlates with the hierarchical rank and  
13 indicates the operation of a distance rule. *Journal of neuroscience* 20, 3263-3281.
- 14 Bassett, D.S., Bullmore, E., Verchinski, B.A., Mattay, V.S., Weinberger, D.R., Meyer-Lindenberg,  
15 A., 2008. Hierarchical organization of human cortical networks in health and schizophrenia.  
16 *Journal of neuroscience* 28, 9239-9248.
- 17 Becker, A., Peters, B., Schroeder, H., Mann, T., Huether, G., Grecksch, G., 2003. Ketamine-  
18 induced changes in rat behaviour: a possible animal model of schizophrenia. *Progress in Neuro-*  
19 *Psychopharmacology and Biological Psychiatry* 27, 687-700.
- 20 Binzegger, T., Douglas, R.J., Martin, K.A., 2009. Topology and dynamics of the canonical circuit  
21 of cat V1. *Neural Networks* 22, 1071-1078.
- 22 Brodmann, K., 1909. Vergleichende Lokalisationslehre der Grosshirnrinde in ihren Prinzipien  
23 dargestellt auf Grund des Zellenbaues. Barth.
- 24 Brüne, M., Lissek, S., Fuchs, N., Witthaus, H., Peters, S., Nicolas, V., Juckel, G., Tegenthoff, M.,  
25 2008. An fMRI study of theory of mind in schizophrenic patients with “passivity” symptoms.  
26 *Neuropsychologia* 46, 1992-2001.
- 27 Brunel, N., Wang, X.-J., 2001. Effects of neuromodulation in a cortical network model of object  
28 working memory dominated by recurrent inhibition. *Journal of computational neuroscience* 11, 63-  
29 85.
- 30 Burt, J.B., Demirtaş, M., Eckner, W.J., Navejar, N.M., Ji, J.L., Martin, W.J., Bernacchia, A.,  
31 Anticevic, A., Murray, J.D., 2018. Hierarchy of transcriptomic specialization across human cortex  
32 captured by structural neuroimaging topography. *Nature neuroscience* 21, 1251.
- 33 Bustillo, J.R., Jones, T., Chen, H., Lemke, N., Abbott, C., Qualls, C., Stromberg, S., Canive, J.,  
34 Gasparovic, C., 2016. Glutamatergic and neuronal dysfunction in gray and white matter: a  
35 spectroscopic imaging study in a large schizophrenia sample. *Schizophrenia Bulletin* 43, 611-  
36 619.
- 37 Butler, P.D., Silverstein, S.M., Dakin, S.C., 2008. Visual perception and its impairment in  
38 schizophrenia. *Biological psychiatry* 64, 40-47.

- 1 Cassidy, C.M., Balsam, P.D., Weinstein, J.J., Rosengard, R.J., Slifstein, M., Daw, N.D., Abi-  
2 Dargham, A., Horga, G., 2018. A perceptual inference mechanism for hallucinations linked to  
3 striatal dopamine. *Current Biology* 28, 503-514. e504.
- 4 Cavanagh, S.E., Lam, N.H., Murray, J.D., Hunt, L.T., Kennerley, S.W., 2019. A circuit mechanism  
5 for irrationalities in decision-making and NMDA receptor hypofunction: behaviour, computational  
6 modelling, and pharmacology. *bioRxiv*, 826214.
- 7 Çavuş, I., Reinhart, R.M., Roach, B.J., Gueorguieva, R., Teyler, T.J., Clapp, W.C., Ford, J.M.,  
8 Krystal, J.H., Mathalon, D.H., 2012. Impaired visual cortical plasticity in schizophrenia. *Biological*  
9 *psychiatry* 71, 512-520.
- 10 Çetin, M.S., Christensen, F., Abbott, C.C., Stephen, J.M., Mayer, A.R., Cañive, J.M., Bustillo,  
11 J.R., Pearlson, G.D., Calhoun, V.D., 2014. Thalamus and posterior temporal lobe show greater  
12 inter-network connectivity at rest and across sensory paradigms in schizophrenia. *NeuroImage*  
13 97, 117-126.
- 14 Chaudhuri, R., Knoblauch, K., Gariel, M.-A., Kennedy, H., Wang, X.-J., 2015. A large-scale circuit  
15 mechanism for hierarchical dynamical processing in the primate cortex. *Neuron* 88, 419-431.
- 16 Corlett, P.R., Frith, C.D., Fletcher, P.C., 2009. From drugs to deprivation: a Bayesian framework  
17 for understanding models of psychosis. *Psychopharmacology* 206, 515-530.
- 18 Corlett, P.R., Honey, G.D., Krystal, J.H., Fletcher, P.C., 2011. Glutamatergic model psychoses:  
19 prediction error, learning, and inference. *Neuropsychopharmacology* 36, 294.
- 20 Corlett, P.R., Horga, G., Fletcher, P.C., Alderson-Day, B., Schmack, K., Powers III, A.R., 2018.  
21 Hallucinations and strong priors. *Trends in cognitive sciences*.
- 22 Corlett, P.R., Murray, G.K., Honey, G.D., Aitken, M.R., Shanks, D.R., Robbins, T.W., Bullmore,  
23 E.T., Dickinson, A., Fletcher, P.C., 2007. Disrupted prediction-error signal in psychosis: evidence  
24 for an associative account of delusions. *Brain* 130, 2387-2400.
- 25 Cox, R.W., 1996. AFNI: software for analysis and visualization of functional magnetic resonance  
26 neuroimages. *Computers and Biomedical research* 29, 162-173.
- 27 Davies, D.J., Teufel, C., Fletcher, P.C., 2017. Anomalous perceptions and beliefs are associated  
28 with shifts toward different types of prior knowledge in perceptual inference. *Schizophrenia*  
29 *Bulletin* 44, 1245-1253.
- 30 Dayan, P., Hinton, G.E., Neal, R.M., Zemel, R.S., 1995. The helmholtz machine. *Neural*  
31 *computation* 7, 889-904.
- 32 Ding, N., Melloni, L., Zhang, H., Tian, X., Poeppel, D., 2016. Cortical tracking of hierarchical  
33 linguistic structures in connected speech. *Nature neuroscience* 19, 158.
- 34 Dondé, C., Silipo, G., Dias, E.C., Javitt, D.C., 2019. Hierarchical deficits in auditory information  
35 processing in schizophrenia. *Schizophrenia research* 206, 135-141.
- 36 Dorph-Petersen, K.A., Pierri, J.N., Wu, Q., Sampson, A.R., Lewis, D.A., 2007. Primary visual  
37 cortex volume and total neuron number are reduced in schizophrenia. *Journal of Comparative*  
38 *Neurology* 501, 290-301.
- 39 Durstewitz, D., Seamans, J.K., 2002. The computational role of dopamine D1 receptors in  
40 working memory. *Neural Networks* 15, 561-572.

- 1 Efron, B., 1987. Better bootstrap confidence intervals. *Journal of the American statistical*  
2 *Association* 82, 171-185.
- 3 Eklund, A., Nichols, T.E., Knutsson, H., 2016. Cluster failure: Why fMRI inferences for spatial  
4 extent have inflated false-positive rates. *Proceedings of the National Academy of Sciences* 113,  
5 7900-7905.
- 6 Felleman, D.J., Van, D.E., 1991. Distributed hierarchical processing in the primate cerebral  
7 cortex. *Cerebral cortex (New York, NY: 1991)* 1, 1-47.
- 8 Fischl, B., 2012. FreeSurfer. *NeuroImage* 62, 774-781.
- 9 Fischl, B., Rajendran, N., Busa, E., Augustinack, J., Hinds, O., Yeo, B.T., Mohlberg, H., Amunts,  
10 K., Zilles, K., 2008. Cortical folding patterns and predicting cytoarchitecture. *Cerebral cortex* 18,  
11 1973-1980.
- 12 Fletcher, P.C., Frith, C.D., 2009. Perceiving is believing: a Bayesian approach to explaining the  
13 positive symptoms of schizophrenia. *Nature Reviews Neuroscience* 10, 48.
- 14 Foss-Feig, J.H., Adkinson, B.D., Ji, J.L., Yang, G., Srihari, V.H., McPartland, J.C., Krystal, J.H.,  
15 Murray, J.D., Anticevic, A., 2017. Searching for cross-diagnostic convergence: neural  
16 mechanisms governing excitation and inhibition balance in schizophrenia and autism spectrum  
17 disorders. *Biological psychiatry* 81, 848-861.
- 18 Friston, K., Kiebel, S., 2009. Predictive coding under the free-energy principle. *Philosophical*  
19 *Transactions of the Royal Society B: Biological Sciences* 364, 1211-1221.
- 20 Frohlich, J., Van Horn, J.D., 2014. Reviewing the ketamine model for schizophrenia. *Journal of*  
21 *psychopharmacology* 28, 287-302.
- 22 Galaburda, A.M., Pandya, D.N., 1983. The intrinsic architectonic and connectional organization of  
23 the superior temporal region of the rhesus monkey. *Journal of Comparative Neurology* 221, 169-  
24 184.
- 25 Glasser, M.F., Coalson, T.S., Robinson, E.C., Hacker, C.D., Harwell, J., Yacoub, E., Ugurbil, K.,  
26 Andersson, J., Beckmann, C.F., Jenkinson, M., 2016. A multi-modal parcellation of human  
27 cerebral cortex. *Nature* 536, 171.
- 28 Glasser, M.F., Sotiropoulos, S.N., Wilson, J.A., Coalson, T.S., Fischl, B., Andersson, J.L., Xu, J.,  
29 Jbabdi, S., Webster, M., Polimeni, J.R., 2013. The minimal preprocessing pipelines for the  
30 Human Connectome Project. *NeuroImage* 80, 105-124.
- 31 Glasser, M.F., Van Essen, D.C., 2011. Mapping human cortical areas in vivo based on myelin  
32 content as revealed by T1-and T2-weighted MRI. *Journal of neuroscience* 31, 11597-11616.
- 33 Glaze, C.M., Kable, J.W., Gold, J.I., 2015. Normative evidence accumulation in unpredictable  
34 environments. *Elife* 4, e08825.
- 35 Gollo, L.L., 2019. Computational Psychiatry: Exploring atypical timescales in the brain. *Elife* 8,  
36 e45089.
- 37 Hasson, U., Chen, J., Honey, C.J., 2015. Hierarchical process memory: memory as an integral  
38 component of information processing. *Trends in cognitive sciences* 19, 304-313.

- 1 Hasson, U., Yang, E., Vallines, I., Heeger, D.J., Rubin, N., 2008. A hierarchy of temporal  
2 receptive windows in human cortex. *Journal of neuroscience* 28, 2539-2550.
- 3 Hawrylycz, M.J., Lein, E.S., Guillozet-Bongaarts, A.L., Shen, E.H., Ng, L., Miller, J.A., Van De  
4 Lagemaat, L.N., Smith, K.A., Ebbert, A., Riley, Z.L., 2012. An anatomically comprehensive atlas  
5 of the adult human brain transcriptome. *Nature* 489, 391-399.
- 6 Hilgetag, C.-C., Van Essen, D.C., O'Neill, M.A., Young, M.P., Felleman, D.J., 1996. Indeterminate  
7 organization of the visual system hierarchies: Response to hilgetag et al. rejoinder: Further  
8 commentary: Determinate or indeterminate organization. *Science* 271, 776-776.
- 9 Honey, C.J., Thesen, T., Donner, T.H., Silbert, L.J., Carlson, C.E., Devinsky, O., Doyle, W.K.,  
10 Rubin, N., Heeger, D.J., Hasson, U., 2012. Slow cortical dynamics and the accumulation of  
11 information over long timescales. *Neuron* 76, 423-434.
- 12 Horga, G., Abi-Dargham, A., 2019. An integrative framework for perceptual disturbances in  
13 psychosis. *Nature Reviews Neuroscience*, 1-16.
- 14 Hyvärinen, J., Poranen, A., 1978. Receptive field integration and submodality convergence in the  
15 hand area of the post-central gyrus of the alert monkey. *The Journal of physiology* 283, 539-556.
- 16 Jardri, R., Hugdahl, K., Hughes, M., Brunelin, J., Waters, F., Alderson-Day, B., Smailes, D.,  
17 Sterzer, P., Corlett, P.R., Leptourgos, P., 2016. Are hallucinations due to an imbalance between  
18 excitatory and inhibitory influences on the brain? *Schizophrenia Bulletin* 42, 1124-1134.
- 19 Javitt, D.C., Sweet, R.A., 2015. Auditory dysfunction in schizophrenia: integrating clinical and  
20 basic features. *Nature Reviews Neuroscience* 16, 535-550.
- 21 Javitt, D.C., Zukin, S.R., Heresco-Levy, U., Umbricht, D., 2012. Has an angel shown the way?  
22 Etiological and therapeutic implications of the PCP/NMDA model of schizophrenia. *Schizophrenia*  
23 *Bulletin* 38, 958-966.
- 24 Ji, J.L., Spronk, M., Kulkarni, K., Repovš, G., Anticevic, A., Cole, M.W., 2019. Mapping the  
25 human brain's cortical-subcortical functional network organization. *NeuroImage* 185, 35-57.
- 26 Kaas, J.H., Hackett, T.A., 2000. Subdivisions of auditory cortex and processing streams in  
27 primates. *Proceedings of the National Academy of Sciences* 97, 11793-11799.
- 28 Kay, S.R., Fiszbein, A., Opler, L.A., 1987. The positive and negative syndrome scale (PANSS) for  
29 schizophrenia. *Schizophrenia Bulletin* 13, 261-276.
- 30 Kehrer, C., Maziashvili, N., Dugladze, T., Gloveli, T., 2008. Altered excitatory-inhibitory balance in  
31 the NMDA-hypofunction model of schizophrenia. *Frontiers in molecular neuroscience* 1, 6.
- 32 Kiebel, S.J., Daunizeau, J., Friston, K.J., 2008. A hierarchy of time-scales and the brain. *PLoS*  
33 *computational biology* 4, e1000209.
- 34 Kiebel, S.J., Daunizeau, J., Friston, K.J., 2009. Perception and hierarchical dynamics. *Frontiers in*  
35 *neuroinformatics* 3, 20.
- 36 Krystal, J.H., D'Souza, D.C., Mathalon, D., Perry, E., Belger, A., Hoffman, R., 2003. NMDA  
37 receptor antagonist effects, cortical glutamatergic function, and schizophrenia: toward a paradigm  
38 shift in medication development. *Psychopharmacology* 169, 215-233.



- 1 Krystal, J.H., Karper, L.P., Seibyl, J.P., Freeman, G.K., Delaney, R., Bremner, J.D., Heninger,  
2 G.R., Bowers, M.B., Charney, D.S., 1994. Subanesthetic effects of the noncompetitive NMDA  
3 antagonist, ketamine, in humans: psychotomimetic, perceptual, cognitive, and neuroendocrine  
4 responses. *Archives of general psychiatry* 51, 199-214.
- 5 Lam, N.H., Borduqui, T., Hallak, J., Roque, A.C., Anticevic, A., Krystal, J.H., Wang, X.-J., Murray,  
6 J.D., 2017. Effects of Altered Excitation-Inhibition Balance on Decision Making in a Cortical  
7 Circuit Model. *bioRxiv*, 100347.
- 8 Lawson, R.P., Mathys, C., Rees, G., 2017. Adults with autism overestimate the volatility of the  
9 sensory environment. *Nature neuroscience* 20, 1293.
- 10 Lee, T.S., Mumford, D., 2003. Hierarchical Bayesian inference in the visual cortex. *JOSA A* 20,  
11 1434-1448.
- 12 Leitman, D.I., Sehatpour, P., Higgins, B.A., Foxe, J.J., Silipo, G., Javitt, D.C., 2010. Sensory  
13 deficits and distributed hierarchical dysfunction in schizophrenia. *American Journal of Psychiatry*  
14 167, 818-827.
- 15 Lerner, Y., Honey, C.J., Silbert, L.J., Hasson, U., 2011. Topographic mapping of a hierarchy of  
16 temporal receptive windows using a narrated story. *Journal of neuroscience* 31, 2906-2915.
- 17 Lewandowski, K.E., DePaola, J., Camsari, G.B., Cohen, B.M., Ongur, D., 2009. Tactile, olfactory,  
18 and gustatory hallucinations in psychotic disorders: a descriptive study. *Ann Acad Med Singapore*  
19 38, 383-385.
- 20 Lim, A., Hoek, H.W., Deen, M.L., Blom, J.D., Bruggeman, R., Cahn, W., de Haan, L., Kahn, R.S.,  
21 Meijer, C.J., Myin-Germeys, I., 2016. Prevalence and classification of hallucinations in multiple  
22 sensory modalities in schizophrenia spectrum disorders. *Schizophrenia research* 176, 493-499.
- 23 Lisman, J.E., Coyle, J.T., Green, R.W., Javitt, D.C., Benes, F.M., Heckers, S., Grace, A.A., 2008.  
24 Circuit-based framework for understanding neurotransmitter and risk gene interactions in  
25 schizophrenia. *Trends in neurosciences* 31, 234-242.
- 26 Major, G., Tank, D., 2004. Persistent neural activity: prevalence and mechanisms. *Current*  
27 *opinion in neurobiology* 14, 675-684.
- 28 Mante, V., Sussillo, D., Shenoy, K.V., Newsome, W.T., 2013. Context-dependent computation by  
29 recurrent dynamics in prefrontal cortex. *Nature* 503, 78.
- 30 Markov, N., Misery, P., Falchier, A., Lamy, C., Vezoli, J., Quilodran, R., Gariel, M., Giroud, P.,  
31 Ercsey-Ravasz, M., Pilaz, L., 2010. Weight consistency specifies regularities of macaque cortical  
32 networks. *Cerebral cortex* 21, 1254-1272.
- 33 Markov, N.T., Ercsey-Ravasz, M., Lamy, C., Gomes, A.R.R., Magrou, L., Misery, P., Giroud, P.,  
34 Barone, P., Dehay, C., Toroczkai, Z., 2013. The role of long-range connections on the specificity  
35 of the macaque interareal cortical network. *Proceedings of the National Academy of Sciences*  
36 110, 5187-5192.
- 37 Markov, N.T., Ercsey-Ravasz, M., Ribeiro Gomes, A., Lamy, C., Magrou, L., Vezoli, J., Misery, P.,  
38 Falchier, A., Quilodran, R., Gariel, M., 2012. A weighted and directed interareal connectivity  
39 matrix for macaque cerebral cortex. *Cerebral cortex* 24, 17-36.

- 1 Markov, N.T., Vezoli, J., Chameau, P., Falchier, A., Quilodran, R., Huissoud, C., Lamy, C.,  
2 Misery, P., Giroud, P., Ullman, S., 2014. Anatomy of hierarchy: feedforward and feedback  
3 pathways in macaque visual cortex. *Journal of Comparative Neurology* 522, 225-259.
- 4 Mazurek, M.E., Roitman, J.D., Ditterich, J., Shadlen, M.N., 2003. A role for neural integrators in  
5 perceptual decision making. *Cerebral cortex* 13, 1257-1269.
- 6 Morel, A., Garraghty, P., Kaas, J., 1993. Tonotopic organization, architectonic fields, and  
7 connections of auditory cortex in macaque monkeys. *Journal of Comparative Neurology* 335,  
8 437-459.
- 9 Moutoussis, M., Bentall, R.P., El-Deredy, W., Dayan, P., 2011. Bayesian modelling of Jumping-  
10 to-Conclusions bias in delusional patients. *Cognitive neuropsychiatry* 16, 422-447.
- 11 Murray, J.D., Bernacchia, A., Freedman, D.J., Romo, R., Wallis, J.D., Cai, X., Padoa-Schioppa,  
12 C., Pasternak, T., Seo, H., Lee, D., 2014. A hierarchy of intrinsic timescales across primate  
13 cortex. *Nature neuroscience* 17, 1661.
- 14 Olney, J.W., Farber, N.B., 1995. Glutamate receptor dysfunction and schizophrenia. *Archives of*  
15 *general psychiatry* 52, 998-1007.
- 16 Poldrack, R.A., Congdon, E., Triplett, W., Gorgolewski, K., Karlsgodt, K., Mumford, J., Sabb, F.,  
17 Freimer, N., London, E., Cannon, T., 2016. A phenome-wide examination of neural and cognitive  
18 function. *Scientific data* 3, 160110.
- 19 Postmes, L., Sno, H., Goedhart, S., Van Der Stel, J., Heering, H., De Haan, L., 2014.  
20 Schizophrenia as a self-disorder due to perceptual incoherence. *Schizophrenia research* 152, 41-  
21 50.
- 22 Power, J.D., Barnes, K.A., Snyder, A.Z., Schlaggar, B.L., Petersen, S.E., 2012. Spurious but  
23 systematic correlations in functional connectivity MRI networks arise from subject motion.  
24 *NeuroImage* 59, 2142-2154.
- 25 Power, J.D., Cohen, A.L., Nelson, S.M., Wig, G.S., Barnes, K.A., Church, J.A., Vogel, A.C.,  
26 Laumann, T.O., Miezin, F.M., Schlaggar, B.L., 2011. Functional network organization of the  
27 human brain. *Neuron* 72, 665-678.
- 28 Powers, A.R., Mathys, C., Corlett, P., 2017. Pavlovian conditioning–induced hallucinations result  
29 from overweighting of perceptual priors. *Science* 357, 596-600.
- 30 Rao, R.P., Ballard, D.H., 1999. Predictive coding in the visual cortex: a functional interpretation of  
31 some extra-classical receptive-field effects. *Nature neuroscience* 2, 79.
- 32 Sarkissov, S., Filimonoff, I., Kononowa, E., Preobraschenskaja, I., Kukuw, L., 1955. Atlas of the  
33 cytoarchitectonics of the human cerebral cortex. Moscow: Medgiz 20.
- 34 Shadlen, M.N., Shohamy, D., 2016. Decision making and sequential sampling from memory.  
35 *Neuron* 90, 927-939.
- 36 Shergill, S.S., Samson, G., Bays, P.M., Frith, C.D., Wolpert, D.M., 2005. Evidence for sensory  
37 prediction deficits in schizophrenia. *American Journal of Psychiatry* 162, 2384-2386.
- 38 Shergill, S.S., White, T.P., Joyce, D.W., Bays, P.M., Wolpert, D.M., Frith, C.D., 2014. Functional  
39 magnetic resonance imaging of impaired sensory prediction in schizophrenia. *JAMA psychiatry*  
40 71, 28-35.

- 1 ShROUT, P.E., Fleiss, J.L., 1979. Intraclass correlations: uses in assessing rater reliability.  
2 Psychological bulletin 86, 420.
- 3 Smith, S.M., Beckmann, C.F., Andersson, J., Auerbach, E.J., Bijsterbosch, J., Douaud, G., Duff,  
4 E., Feinberg, D.A., Griffanti, L., Harms, M.P., 2013. Resting-state fMRI in the human connectome  
5 project. NeuroImage 80, 144-168.
- 6 Spence, S.A., Brooks, D.J., Hirsch, S.R., Liddle, P.F., Meehan, J., Grasby, P.M., 1997. A PET  
7 study of voluntary movement in schizophrenic patients experiencing passivity phenomena  
8 (delusions of alien control). Brain: a journal of neurology 120, 1997-2011.
- 9 Stephan, K.E., Weiskopf, N., Drysdale, P.M., Robinson, P.A., Friston, K.J., 2007. Comparing  
10 hemodynamic models with DCM. NeuroImage 38, 387-401.
- 11 Stephens, G.J., Honey, C.J., Hasson, U., 2013. A place for time: the spatiotemporal structure of  
12 neural dynamics during natural audition. Journal of neurophysiology 110, 2019-2026.
- 13 Sterzer, P., Adams, R.A., Fletcher, P., Frith, C., Lawrie, S.M., Muckli, L., Petrovic, P., Uhlhaas,  
14 P., Voss, M., Corlett, P.R., 2018. The predictive coding account of psychosis. Biological  
15 psychiatry 84, 634-643.
- 16 Teufel, C., Subramaniam, N., Dobler, V., Perez, J., Finnemann, J., Mehta, P.R., Goodyer, I.M.,  
17 Fletcher, P.C., 2015. Shift toward prior knowledge confers a perceptual advantage in early  
18 psychosis and psychosis-prone healthy individuals. Proceedings of the National Academy of  
19 Sciences 112, 13401-13406.
- 20 Transtrum, M.K., Machta, B.B., Sethna, J.P., 2010. Why are nonlinear fits to data so challenging?  
21 Physical review letters 104, 060201.
- 22 van der Gaag, M., Hoffman, T., Remijsen, M., Hijman, R., de Haan, L., van Meijel, B., van Harten,  
23 P.N., Valmaggia, L., De Hert, M., Cuijpers, A., 2006. The five-factor model of the Positive and  
24 Negative Syndrome Scale II: a ten-fold cross-validation of a revised model. Schizophrenia  
25 research 85, 280-287.
- 26 Van Essen, D.C., Anderson, C.H., Felleman, D.J., 1992. Information processing in the primate  
27 visual system: an integrated systems perspective. Science 255, 419-423.
- 28 Van Essen, D.C., Smith, S.M., Barch, D.M., Behrens, T.E., Yacoub, E., Ugurbil, K., Consortium,  
29 W.-M.H., 2013. The WU-Minn human connectome project: an overview. NeuroImage 80, 62-79.
- 30 Van Essen, D.C., Ugurbil, K., Auerbach, E., Barch, D., Behrens, T., Bucholz, R., Chang, A.,  
31 Chen, L., Corbetta, M., Curtiss, S.W., 2012. The Human Connectome Project: a data acquisition  
32 perspective. NeuroImage 62, 2222-2231.
- 33 VandenBos, G.R., 2007. APA dictionary of psychology. American Psychological Association.
- 34 Vázquez-Rodríguez, B., Suárez, L.E., Markello, R.D., Shafiei, G., Paquola, C., Hagmann, P., Van  
35 Den Heuvel, M.P., Bernhardt, B.C., Spreng, R.N., Misic, B., 2019. Gradients of structure–function  
36 tethering across neocortex. Proceedings of the National Academy of Sciences 116, 21219-21227.
- 37 Vogt, O., 1911. Die myeloarchitektonik des isocortex parietalis. J Psychol Neurol 18, 107-118.
- 38 Von Economo, C., 1929. The cytoarchitectonics of the human cerebral cortex. H. Milford Oxford  
39 University Press.

- 1 Wagstyl, K., Ronan, L., Goodyer, I.M., Fletcher, P.C., 2015. Cortical thickness gradients in  
2 structural hierarchies. *NeuroImage* 111, 241-250.
- 3 Watanabe, T., Rees, G., Masuda, N., 2019. Atypical intrinsic neural timescale in autism. *Elife* 8,  
4 e42256.
- 5 Waters, F., Fernyhough, C., 2017. Hallucinations: a systematic review of points of similarity and  
6 difference across diagnostic classes. *Schizophrenia Bulletin* 43, 32-43.
- 7 Weinberger, D.R., 1987. Implications of normal brain development for the pathogenesis of  
8 schizophrenia. *Archives of general psychiatry* 44, 660-669.
- 9 Weinstein, J.J., Chohan, M.O., Slifstein, M., Kegeles, L.S., Moore, H., Abi-Dargham, A., 2017.  
10 Pathway-specific dopamine abnormalities in schizophrenia. *Biological psychiatry* 81, 31-42.
- 11 Yang, G.J., Murray, J.D., Wang, X.-J., Glahn, D.C., Pearlson, G.D., Repovs, G., Krystal, J.H.,  
12 Anticevic, A., 2016. Functional hierarchy underlies preferential connectivity disturbances in  
13 schizophrenia. *Proceedings of the National Academy of Sciences* 113, E219-E228.
- 14 Young, M.P., 1993. The organization of neural systems in the primate cerebral cortex.  
15 *Proceedings of the Royal Society of London. Series B: Biological Sciences* 252, 13-18.
- 16
